# Supplementary material
Source: PubMed Central journal article supplement (PMC4553764)
Supplement: pnas.1500163112.sapp.pdf [file pnas.1500163112.sapp.pdf]

# Supplementary Materials for 'Cryptic infection of a broad taxonomic and geographic diversity of tadpoles by Perkinsea protists' by Chambouvet et al.

|                                                                                                                                                              |    |
|--------------------------------------------------------------------------------------------------------------------------------------------------------------|----|
| Supplementary Figure S1: Geographic distribution of previously reported detections of Perkinsus-like parasites in the USA.....                               | 2  |
| Supplementary Figure S2: similarity between SSU rDNA sequences from clades A, B and C identified in this study.....                                          | 4  |
| Supplementary Table S1: Primers used in this study. ....                                                                                                     | 7  |
| Supplementary Table S2: List of freshwater environments sampled in this study.....                                                                           | 8  |
| Supplementary Table S3: Details of the environmental sequences included in the phylogenetic analysis shown in figure 1. ....                                 | 10 |
| Supplementary Table S4: GenBank environmental 18S rDNA sequences belonging to Perkinsea (Alveolata) used in phylogenetic analysis reported in Figure 1. .... | 14 |
| Supplementary Table S5: Detail of tadpoles tested in this study and the corresponding NCBI accession number of the 16S rRNA gene sequence.....               | 20 |
| Supplementary Table S6: Label information for each NAG01 targeted clone library sequence recovered from the frog liver sampled. ....                         | 44 |
| Supplementary Table S7: Details of published 18S rDNA sequences of known taxa used in phylogenetic analysis reported in Figure 1. ....                       | 51 |
| Supplementary Table S8: Table of first hit of the BLASTn results of the amphibian 16S sequence using Mega BLAST. ....                                        | 53 |
| Supplementary Table S9: Details of published 16S rDNA sequences of known amphibian taxa used in the phylogenetic analysis shown in Figure 3.....             | 59 |
| Supplementary Table S10: Detail of environmental sequences sampled from GenBank and reduced to triangles on Figure 1. ....                                   | 68 |
| References .....                                                                                                                                             | 73 |

**Supplementary Figure S1: Geographic distribution of previously reported detections of Perkinsus-like parasites in the USA.**

States coloured in blue are where a mortality diagnosis has been attributed to *Perkinsus*-like parasites (data available at [http://www.nwhc.usgs.gov/publications/quarterly\\_reports](http://www.nwhc.usgs.gov/publications/quarterly_reports)). Circles represented the mortality events described in peer-reviewed scientific publications. The yellow circle represents mortality events where molecular data has been used to confirm the presence of the *Perkinsus*-like parasite. The green circles represent the sites of mortality events attributed to *Perkinsus*-like parasites using microscopy but where no molecular data was published. The number inside each circles correspond to the table below with details of each mortality event/publication.

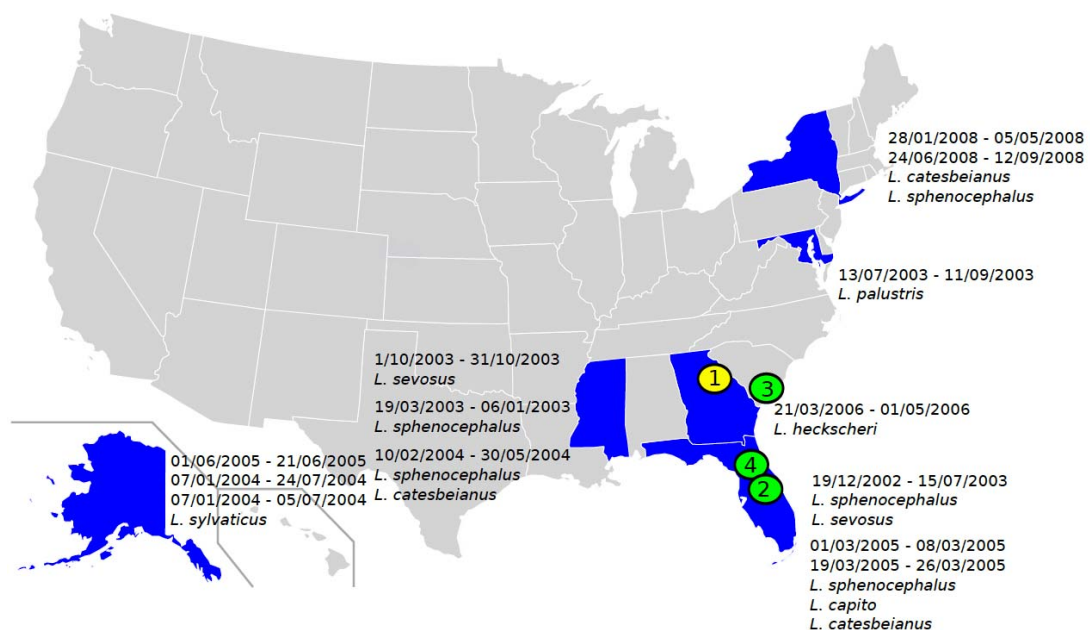

| Number in circles | States | Location                           | GPS point                    | Dates                                | Host species                                                          | Reference |
|-------------------|--------|------------------------------------|------------------------------|--------------------------------------|-----------------------------------------------------------------------|-----------|
| 1                 | GA     | Georgia Whitehall forest           | 33°53'05"N<br>83°21'28"W     | April / May 2006                     | <i>L. sphenoccephalus</i>                                             | (1)       |
| 2                 | FL     | Blue pond                          | 29°42'40.3"N<br>81°59'36.6"W | Jan. 2006                            | <i>L. sphenoccephalus</i>                                             | (2)       |
|                   | FL     | Perkinsus pond                     | 30°3'38.6"N<br>84°23'45.8"N  | Dec. 2002,<br>Feb. 2003,<br>May 2003 | <i>L. sphenoccephalus</i> ,<br><i>A. gryllus</i>                      |           |
|                   | FL     | Withlacoochee State forest-croom15 | 28°35'52.9"N<br>82°14'59.4"W | March 2005                           | <i>L. capito</i> , <i>L. catesbeianus</i> , <i>L. sphenoccephalus</i> |           |
|                   | FL     | Withlacoochee State forest-croom16 | 28°35'51.1"N<br>82°14'56.4"W | March 2005                           | <i>L. capito</i> , <i>L. catesbeianus</i> , <i>L. sphenoccephalus</i> |           |
| 3                 | SC     | Savannah river site                | 33°18'59.4"N<br>81°32'21"W   | Jan. 2006                            | <i>L. sphenoccephalus</i>                                             | (3)       |
| 4                 | FL     | Pebbe lake                         | 29°49'31.4"N<br>81°57'12.6"W | April 2011                           | <i>L. capito</i> , <i>L. catesbeianus</i> , <i>L. sphenoccephalus</i> | (4)       |

**Supplementary Figure S2: similarity between SSU rDNA sequences from clades A, B and C identified in this study.**

**(A)** Graphical representation of sequence polymorphisms across the SSU rDNA sequence sampled in clusters A, B and C (<http://weblogo.berkeley.edu>). Gaps indicate rare nucleotide insertions. **(B)** Identity percentage between the three clusters A, B, C and the published sequence of the previously sampled frog *Perkinsus* (EF675616 – (1)). Data reported in Tables B was calculated using the SIAS website (available at <http://imed.med.ucm.es/Tools/sias.html>).

**A.**

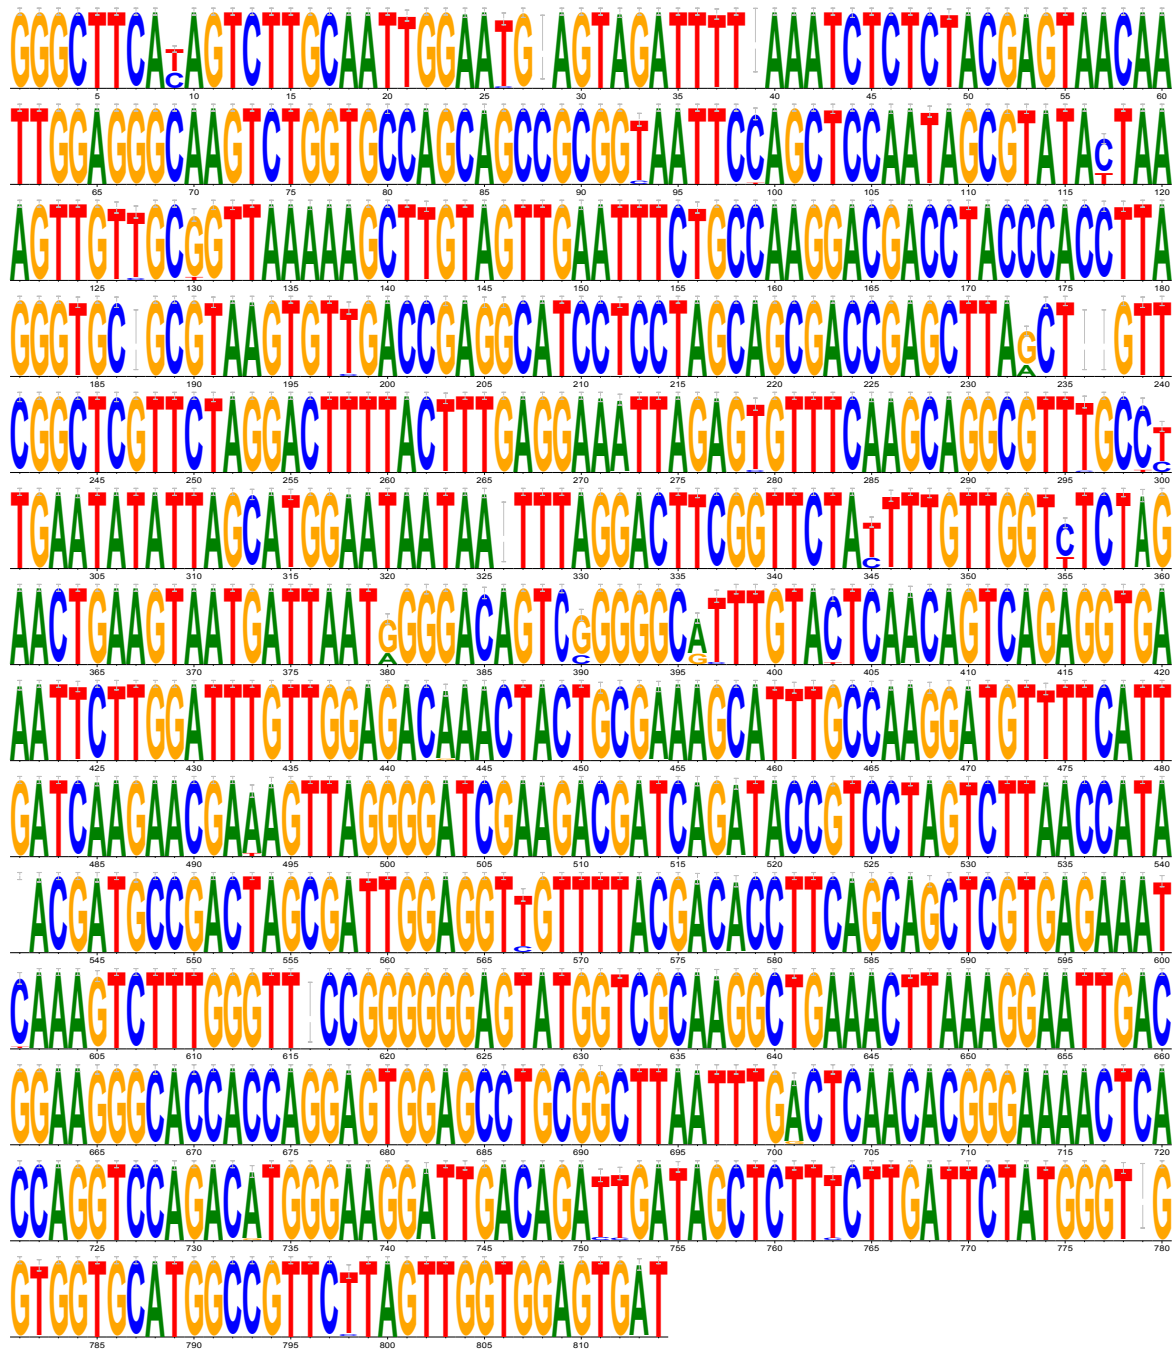

**B.**

|          | Clade A | Clade B | Clade C | EF675616 |
|----------|---------|---------|---------|----------|
| Clade A  | 100%    | 98.64%  | 97.52%  | 92.21%   |
| Clade B  |         | 100%    | 97.89%  | 92.58%   |
| Clade C  |         |         | 100%    | 91.96%   |
| EF675616 |         |         |         | 100%     |

**Supplementary Figure S3: Transverse sections (5  $\mu\text{m}$  thick) of liver tissue sample stained with H&E method.**

(A-B) represent A11 liver sample from Cameroon (Africa), (C-D) from A35 liver sample from Tanzania (Africa) and (E-F) from T5.1 liver sample from Fr. Guiana (sections from five further samples not shown). Digital image was obtained using x 10 objective (A-E) and x 20 objective (F). Scale bar represent 10 $\mu\text{m}$ .

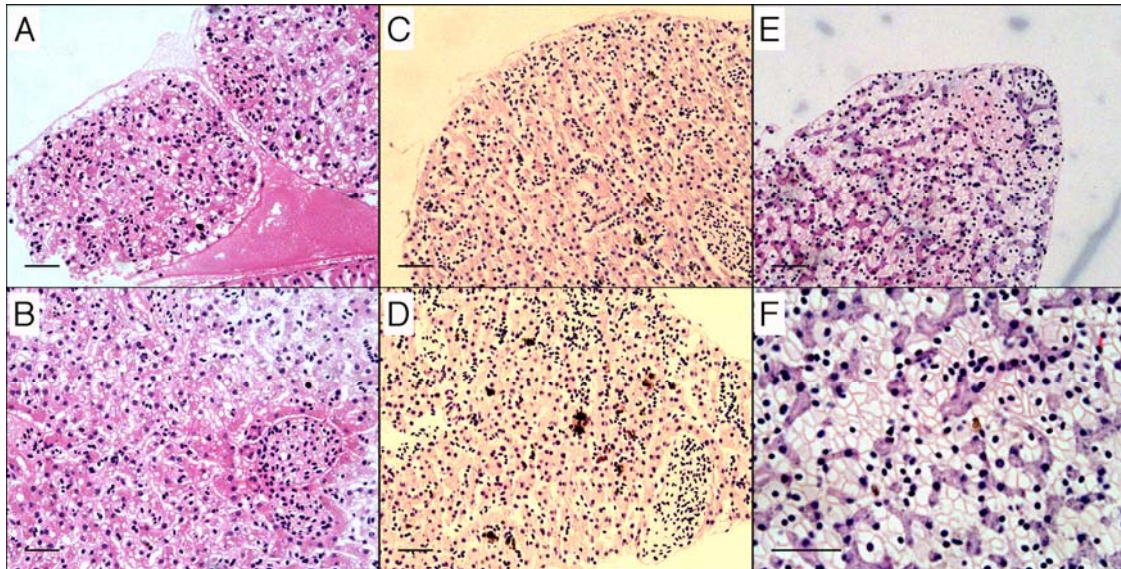

**Supplementary Table S1: Primers used in this study.**

| Primer name | Primer sequence (5'-3') | Specificity   | Reference  |
|-------------|-------------------------|---------------|------------|
| 86F-B       | CTTGCCYGGCGATRGAYCT     | NAG01 Cluster | This study |
| 300F-B      | GGGCTTCAYAGTCTTGCAAT    | NAG01 Cluster | This study |
| 1294 R      | CCAGRACATCTAAGGGCATCA   | eukaryotes    | This study |
| 1282 R      | TAAGGGCATCACWGACCTGTTAT | eukaryotes    | This study |
| 600R        | GAATTTACCTCTGACSGTTTG   | eukaryotes    | This study |
| 16Sar-F     | CGCCTGTTTATCAAAACAT     | vertebrates   | (5)        |
| 16Sar-R     | CCGGTCTGAACTCAGATCACGT  | vertebrates   | (5)        |

**Supplementary Table S2: List of freshwater environments sampled in this study.**

| Name                   | Locations                      | Country | GPS                           | Date       | Size       | Volume   | Description          | Number of | Number   |
|------------------------|--------------------------------|---------|-------------------------------|------------|------------|----------|----------------------|-----------|----------|
|                        |                                |         |                               | dd/mm/yyyy | fraction   | filtered |                      | clones    | of NAG01 |
|                        |                                |         |                               |            | ( $\mu$ m) | (L)      |                      | sequenced | clones   |
| Kennick reservoir      | Dartmoor National Park (Devon) | UK      | N50°39'00"<br>W3°41'24"       | 26/01/2010 | 0.2-20     | 0.5      | Large reservoir      | 21        | 16       |
| Washington Singer Pond | Exeter University              | UK      | N50°43'58.8"<br>W3°32'13.2"   | 03/11/2009 | 2-20       | 0.6      | Small permanent pond | 65        | 61       |
|                        |                                |         |                               | 29/11/2009 | 2-20       | 0.6      |                      | 15        | 13       |
| Tottiford reservoir    | Dartmoor National Park (Devon) | UK      | N50°37'55.2"<br>W3°40'58.799" | 26/01/2010 | 0.2-20     | 0.4      | Large reservoir      | 42        | 31       |
| Trenchford reservoir   | Dartmoor National Park (Devon) | UK      | N50°37'48"<br>W3°41'16.8"     | 26/01/2010 | 2-20       | 1        | Large reservoir      | 24        | 22       |
| NHM pond               | Natural History Museum, London | UK      | N51°29'45"<br>W0°10'42"       | 18/09/2011 | 0.2-20     | 1        | Small permanent pond | 53        | 30       |



|                |                                          |               |                             |                    |        |      |                            |    |    |
|----------------|------------------------------------------|---------------|-----------------------------|--------------------|--------|------|----------------------------|----|----|
|                |                                          |               |                             | 15/05/2013         | 2-5    | 1    |                            | 10 | 5  |
| SL             | Sevenoaks pond<br>London                 | UK            | N51°16'14.5"<br>E0°11'22.1" | 15/05/2013         | 2-5    | 1    | Small pond                 | 10 | 9  |
| Ullswater lake | Lake District National Park<br>(Cumbria) | UK            | N54°34'34"<br>W2°53'09"     | April/July<br>2010 | 0.2-10 | 1    | Lake-<br>Oligo/mesotrophic | 8  | 7  |
| T1             | Near Roura                               | Fr.<br>Guiana | N4°38'34"<br>W52°17'57"     | April 2013         | 2-5    | 1    | Seasonal pond              | 20 | 15 |
| T2             | Near Patawa                              | Fr.<br>Guiana | N4°31'45.8"<br>W52°09'05.6" | April 2013         | 2-5    | 0.55 | Permanent pond             | 20 | 13 |
| T6             | Patawa-Kaw                               | Fr.<br>Guiana | N4°31'23.8"<br>W52°6'36.8"  | April 2013         | 2-5    | 1    | Small seasonal pond        | 20 | 18 |

---

**Supplementary Table S3: Details of the environmental sequences included in the phylogenetic analysis shown in figure 1.**

| Sequence name | Name                   | Location                       | Country | Date dd/mm/yyyy | NCBI accession number |
|---------------|------------------------|--------------------------------|---------|-----------------|-----------------------|
| BIB1_A2       | Kennick reservoir      | Dartmoor National Park (Devon) | UK      | 26/01/2010      | KP122562              |
| Bib1_E2       | Kennick reservoir      | Dartmoor National Park (Devon) | UK      | 26/01/2010      | KP122557              |
| Bib1_E3       | Kennick reservoir      | Dartmoor National Park (Devon) | UK      | 26/01/2010      | KP122534              |
| BIB1_F2       | Kennick reservoir      | Dartmoor National Park (Devon) | UK      | 26/01/2010      | KP122523              |
| BIB1_G1       | Kennick reservoir      | Dartmoor National Park (Devon) | UK      | 26/01/2010      | KP122546              |
| BIB1-D1       | Kennick reservoir      | Dartmoor National Park (Devon) | UK      | 26/01/2010      | KP122521              |
| BiB1-D3       | Kennick reservoir      | Dartmoor National Park (Devon) | UK      | 26/01/2010      | KP122539              |
| BIB3_B11      | Washington Singer Pond | Exeter University              | UK      | 03/11/2009      | KP122563              |
| BIB3_B9       | Washington Singer Pond | Exeter University              | UK      | 03/11/2009      | KP122559              |
| BIB3_D3       | Washington Singer Pond | Exeter University              | UK      | 03/11/2009      | KP122529              |
| BIB3_H8       | Washington Singer Pond | Exeter University              | UK      | 29/10/2009      | KP122530              |
| BIB4_A10      | NHM pond               | Natural History Museum, London | UK      | 18/09/2011      | KP122537              |
| BIB4_D12      | NHM pond               | Natural History Museum, London | UK      | 18/09/2011      | KP122540              |
| BIB4_E12      | NHM pond               | Natural History Museum, London | UK      | 18/09/2011      | KP122536              |
| BIB4_F10      | NHM pond               | Natural History Museum, London | UK      | 18/09/2011      | KP122520              |

|          |                      |                                       |    |            |          |
|----------|----------------------|---------------------------------------|----|------------|----------|
| BIB4_G2  | Ullswater lake       | Lake District National Park (Cumbria) | UK | 2010       | KP122551 |
| BIB4_G4  | NHM pond             | Natural History Museum, London        | UK | 18/09/2011 | KP122528 |
| BIB4_G7  | Ullswater lake       | Lake District National Park (Cumbria) | UK | 2010       | KP122525 |
| BIB4_H10 | NHM pond             | Natural History Museum, London        | UK | 18/09/2011 | KP122552 |
| BIB5_A11 | Trenchford reservoir | Dartmoor National Park (Devon)        | UK | 26/01/2010 | KP122555 |
| BIB5_A4  | Tottiford reservoir  | Dartmoor National Park (Devon)        | UK | 26/01/2010 | KP122558 |
| BIB5_B10 | Trenchford reservoir | Dartmoor National Park (Devon)        | UK | 26/01/2010 | KP122524 |
| BIB5_B12 | Trenchford reservoir | Dartmoor National Park (Devon)        | UK | 26/01/2010 | KP122544 |
| BIB5_B5  | Tottiford reservoir  | Dartmoor National Park (Devon)        | UK | 26/01/2010 | KP122560 |
| BIB5_C10 | Trenchford reservoir | Dartmoor National Park (Devon)        | UK | 26/01/2010 | KP122538 |
| BIB5_C12 | Trenchford reservoir | Dartmoor National Park (Devon)        | UK | 26/01/2010 | KP122556 |
| BIB5_C6  | Tottiford reservoir  | Dartmoor National Park (Devon)        | UK | 26/01/2010 | KP122561 |
| BIB5_D12 | Trenchford reservoir | Dartmoor National Park (Devon)        | UK | 26/01/2010 | KP122522 |
| BIB5_F1  | Tottiford reservoir  | Dartmoor National Park (Devon)        | UK | 26/01/2010 | KP122554 |
| BIB5_F12 | Trenchford reservoir | Dartmoor National Park (Devon)        | UK | 26/01/2010 | KP122553 |
| BIB5_F9  | Kennick reservoir    | Dartmoor National Park (Devon)        | UK | 26/01/2010 | KP122527 |

|                                      |                                                  |                                |               |            |          |
|--------------------------------------|--------------------------------------------------|--------------------------------|---------------|------------|----------|
| BIB5_H9                              | Kennick reservoir                                | Dartmoor National Park (Devon) | UK            | 26/01/2010 | KP122535 |
| BIB6_A8                              | SL                                               | Sevenoaks pond<br>London       | UK            | 15/05/2013 | KP122564 |
| BIB6_B2                              | NHM pond                                         | Natural History Museum, London | UK            | 15/05/2013 | KP122533 |
| BIB6_C3                              | NHM pond                                         | Natural History Museum, London | UK            | 15/05/2013 | KP122532 |
| BIB6_E1                              | NHM pond                                         | Natural History Museum, London | UK            | 15/05/2013 | KP122542 |
| BIB6_F7                              | SL                                               | Sevenoaks pond<br>London       | UK            | 15/05/2013 | KP122531 |
| G1_2013_A1                           | T2                                               | Near Patawa                    | Fr.<br>Guiana | April 2013 | KP122545 |
| G1_2013_A2                           | T2                                               | Near Patawa                    | Fr.<br>Guiana | April 2013 | KP122548 |
| G1_2013_G1                           | T2                                               | Near Patawa                    | Fr.<br>Guiana | April 2013 | KP122547 |
| G1_2013_H1                           | T2                                               | Near Patawa                    | Fr.<br>Guiana | April 2013 | KP122549 |
| G1_2013_H2                           | T2                                               | Near Patawa                    | Fr.<br>Guiana | April 2013 | KP122550 |
| G2013_T1_A7                          | T1                                               | Near Roura                     | Fr.<br>Guiana | April 2013 | KP122543 |
| G2013_T1_E5                          | T1                                               | Near Roura                     | Fr.<br>Guiana | April 2013 | KP122565 |
| G2013_T1_H5                          | T1                                               | Near Roura                     | Fr.<br>Guiana | April 2013 | KP122526 |
| G2013_T6_F11                         | T6                                               | Patawa-Kaw                     | Fr.<br>Guiana | April 2013 | KP122541 |
| Liver_mortality<br>event_clone_85.1c | University of<br>Georgia's Whitehall Forest pond | Athens, GA                     | USA           | 2003       | KP122566 |

|                                      |                                                  |            |     |      |          |
|--------------------------------------|--------------------------------------------------|------------|-----|------|----------|
| Liver_mortality<br>event_clone_85.2c | University of<br>Georgia's Whitehall Forest pond | Athens, GA | USA | 2003 | KP122615 |
| Liver_mortality<br>event_clone_85.3c | University of<br>Georgia's Whitehall Forest pond | Athens, GA | USA | 2003 | KP122567 |
| Liver_mortality<br>event_clone_85.4c | University of<br>Georgia's Whitehall Forest pond | Athens, GA | USA | 2003 | KP122568 |
| Liver_mortality<br>event_clone_85.5c | University of<br>Georgia's Whitehall Forest pond | Athens, GA | USA | 2003 | KP122569 |

---

**Supplementary Table S4: GenBank environmental 18S rDNA sequences belonging to Perkinsea (Alveolata) used in phylogenetic analysis reported in Figure 1.**

Sequences sampled from marine environments are highlighted in grey. Database searched May 2014.

| Accession no. | Environmental clone | Environment  | Location               | Sampled environment   | Reference |
|---------------|---------------------|--------------|------------------------|-----------------------|-----------|
| EF196787      | B91                 | Lake Bourget | Alps, France           | Mesotrophic lake      | (6)       |
| DQ244038      | PAB5AU2004          | Lake Pavin   | Massif Central, France | Oligomesotrophic lake | (7)       |
| EU162625      | PAG5SP2005          | Lake Pavin   | Massif Central, France | Oligomesotrophic lake | (8)       |
| EU162626      | PAC11SP2005         | Lake Pavin   | Massif Central, France | Oligomesotrophic lake | (8)       |
| EU162628      | PAD1SP2005          | Lake Pavin   | Massif Central, France | Oligomesotrophic lake | (8)       |
| EU162627      | PAD12SP2005         | Lake Pavin   | Massif Central, France | Oligomesotrophic lake | (8)       |

|          |             |                 |                           |                        |     |
|----------|-------------|-----------------|---------------------------|------------------------|-----|
| EU162629 | PAA8SP2005  | Lake Pavin      | Massif Central,<br>France | Oligomesotrophic lake  | (8) |
| DQ244020 | PAB11AU2004 | Lake Pavin      | Massif Central,<br>France | Oligomesotrophic lake  | (8) |
| DQ244037 | PAF7AU2004  | Lake Pavin      | Massif Central,<br>France | Oligomesotrophic lake  | (7) |
| DQ244021 | PAD10AU2004 | Lake Pavin      | Massif Central,<br>France | Oligomesotrophic lake  | (7) |
| DQ244035 | PAD7AU2004  | Lake Pavin      | Massif Central,<br>France | Oligomesotrophic lake  | (7) |
| DQ244034 | PAG2AU2004  | Lake Pavin      | Massif Central,<br>France | Oligomesotrophic lake  | (7) |
| EF527175 | SA2_2G9     | Framvaren Fjord | South-western<br>Norway   | Axonic/sulfidic waters | (9) |
| EU162624 | PAA9SP2005  | Lake Pavin      | Massif Central,<br>France | Oligomesotrophic lake  | (8) |

|          |            |                             |                           |                       |      |
|----------|------------|-----------------------------|---------------------------|-----------------------|------|
| EU162630 | PAC8SP2005 | Lake Pavin                  | Massif Central,<br>France | Oligomesotrophic lake | (8)  |
| HQ191345 | PA2009C9   | Lake Pavin                  | Massif Central,<br>France | Oligomesotrophic lake | (10) |
| AJ402327 | OL11001    | Equatorial Pacific<br>Ocean | Pacific Ocean             | Marine waters         | (11) |
| AY642744 | A31        | Lake Aydat                  | Massif Central,<br>France | Eutrophic lake        | (12) |
| AY642737 | A20        | Lake Aydat                  | Massif Central,<br>France | Eutrophic lake        | (12) |
| EF526795 | NA2_4B10   | Framvaren Fjord             | Norway                    | Anoxic marine waters  | (9)  |
| EF526831 | NA1_3C6    | Framvaren Fjord             | Norway                    | Anoxic marine waters  | (9)  |
| EF526760 | NA2_2D10   | Framvaren Fjord             | Norway                    | Anoxic marine waters  | (9)  |



|          |                |                       |                                             |                       |                                |
|----------|----------------|-----------------------|---------------------------------------------|-----------------------|--------------------------------|
| DQ103802 | M2_18C03       | Mariager Fjord        | Danish east coast                           | Anoxic marine waters  | (13)                           |
| AF530536 | AT4-98         | Hydrothermal sediment | Hydrothermal vents, Mid-Atlantic Ridge      | Extreme environment   | (14)                           |
| GQ330637 | PR2_3E_17      | Praz Rodet peat bog   | Switzerland                                 | Acidic extreme waters | (15)                           |
| FJ832127 | BW-dinoclone29 | Ship ballast water    | Singapore ballast water                     | Marine waters         | Park <i>et al.</i> unpublished |
| DQ455739 | BB01-172.24w   | Estuary               | USA: Barnegat Bay, NJ                       | Marine waters         | Lim <i>et al.</i> unpublished  |
| AY919720 | LG10-12        | Lake George           | Adirondack Park North-Eastern New York, USA | Oligotrophic lake     | (16)                           |
| AY919735 | LG15-08        | Lake George           | Adirondack Park North-Eastern New York, USA | Oligotrophic lake     | (16)                           |
| AY919809 | LG36-11        | Lake George           | Adirondack Park North-Eastern New York, USA | Oligotrophic lake     | (16)                           |

|          |             |                 |                                                   |                       |      |
|----------|-------------|-----------------|---------------------------------------------------|-----------------------|------|
| AY919712 | LG09-02     | Lake George     | Adirondack Park<br>North-Eastern New<br>York, USA | Oligotrophic lake     | (16) |
| AY919821 | LG53-06     | Lake George     | Adirondack Park<br>North-Eastern New<br>York, USA | Oligotrophic lake     | (16) |
| AY919820 | LG50-10     | Lake George     | Adirondack Park<br>North-Eastern New<br>York, USA | Oligotrophic lake     | (16) |
| AY919736 | LG15-10     | Lake George     | Adirondack Park<br>North-Eastern New<br>York, USA | Oligotrophic lake     | (16) |
| AF530534 | IN242       | Microcolonizers | Hydrothermal vents,<br>Mid-Atlantic Ridge         | Extreme environment   | (14) |
| DQ244027 | PAA22AU2004 | Lake Pavin      | Massif Central,<br>France                         | Oligomesotrophic lake | (7)  |
| DQ244031 | PAF8AU2004  | Lake Pavin      | Massif Central,<br>France                         | Oligomesotrophic lake | (7)  |
| AY919769 | LG25-01     | Lake George     | Adirondack Park<br>North-Eastern New<br>York, USA | Oligotrophic lake     | (16) |

|           |             |                 |                                                   |                       |                                    |
|-----------|-------------|-----------------|---------------------------------------------------|-----------------------|------------------------------------|
| GU290070  | TKR07E.24   | Lake Tanganyika | East Africa                                       |                       | Tarbe <i>et al.</i><br>unpublished |
| AY919682  | LG02-01     | Lake George     | Adirondack Park<br>North-Eastern New<br>York, USA | Oligotrophic lake     | (16)                               |
| JN090897  | KRL01E37    | Lake Karla      | Greece                                            | Lake                  | (17)                               |
| JN090873  | KRL01E13    | Lake Karla      | Greece                                            | Lake                  | (17)                               |
| AF530535  | AT2-6       | Microcolonizers | Hydrothermal vents,<br>Mid-Atlantic Ridge         | Extreme environment   | (14)                               |
| EU162621* | PAA10SP2005 | Lake Pavin      | Massif Central,<br>France                         | Oligomesotrophic lake | (8)                                |
| EU162622* | PAB8SP2005  | Lake Pavin      | Massif Central,<br>France                         | Oligomesotrophic lake | (8)                                |
| EU162623* | PAB88SP2005 | Lake Pavin      | Massif Central,<br>France                         | Oligomesotrophic lake | (8)                                |

---

\* Excluded as central portion of the database sequence was absent

**Supplementary Table S5: Detail of tadpoles tested in this study and the corresponding NCBI accession number of the 16S rRNA gene sequence.**

Individual tadpoles highlighted in grey are positive for PCR detection of the NAG01 protist. Life stage was determined using the Gosner's table (18) except the tadpoles from A1 to A7 where life stages (labelled with an '\*') was identified using the Nieuwkoop and Faber table (19). The column headed "Tadpole BLAST iD" reports the taxonomy of the closest GenBank, please see Table S8 for further details.

| Location   | Date    | Environment | GPS coordinate          | Locality                        | Altitude (m) | Sampling event / locality | Tadpole ID | Tadpole BLAST ID               | Life stage | NCBI accession number |
|------------|---------|-------------|-------------------------|---------------------------------|--------------|---------------------------|------------|--------------------------------|------------|-----------------------|
| Fr. Guiana | 04/2013 | T1          | N4°38'34"<br>W52°17'57" | Fourgassie junction, near Roura | 240          | FG1                       | G1.1       | <i>Leptodactylus knudseni</i>  | 40         | KP122399              |
| Fr. Guiana | 04/2013 | T1          | N4°38'34"<br>W52°17'57" | Fourgassie junction, near Roura | 240          | FG1                       | G1.2       | <i>Leptodactylus knudseni</i>  | 34/35      | KP122400              |
| Fr. Guiana | 04/2013 | T1          | N4°38'34"<br>W52°17'57" | Fourgassie junction, near Roura | 240          | FG1                       | G1.3       | <i>Leptodactylus knudseni</i>  | 40         | KP122401              |
| Fr. Guiana | 04/2013 | T1          | N4°38'34"<br>W52°17'57" | Fourgassie junction, near Roura | 240          | FG1                       | G1.4       | <i>Leptodactylus knudseni</i>  | 31         | KP122402              |
| Fr. Guiana | 04/2013 | T1          | N4°38'34"<br>W52°17'57" | Fourgassie junction, near Roura | 240          | FG1                       | G1.5       | <i>Phyllomedusa tomopterna</i> | 29         | KP122403              |

|            |                |    |                             |             |     |     |      |                                    |    |          |
|------------|----------------|----|-----------------------------|-------------|-----|-----|------|------------------------------------|----|----------|
| Fr. Guiana | 14/04/20<br>13 | T2 | N4°31'45.8"<br>W52°09'05.6" | Near Patawa | 309 | FG2 | G2.1 | <i>Phyllomedusa<br/>tomopterna</i> | 30 | KP122405 |
| Fr. Guiana | 14/04/20<br>13 | T2 | N4°31'45.8"<br>W52°09'05.6" | Near Patawa | 309 | FG2 | G2.2 | <i>Phyllomedusa<br/>tomopterna</i> | 29 | KP122406 |
| Fr. Guiana | 14/04/20<br>13 | T2 | N4°31'45.8"<br>W52°09'05.6" | Near Patawa | 309 | FG2 | G2.3 | <i>Phyllomedusa<br/>tomopterna</i> | 29 | KP122407 |
| Fr. Guiana | 14/04/20<br>13 | T2 | N4°31'45.8"<br>W52°09'05.6" | Near Patawa | 309 | FG2 | G2.4 | <i>Phyllomedusa<br/>tomopterna</i> | 26 | KP122408 |
| Fr. Guiana | 14/04/20<br>13 | T2 | N4°31'45.8"<br>W52°09'05.6" | Near Patawa | 309 | FG2 | G2.5 | <i>Phyllomedusa<br/>tomopterna</i> | 37 | KP122409 |
| Fr. Guiana | 14/04/20<br>13 | T2 | N4°31'45.8"<br>W52°09'05.6" | Near Patawa | 309 | FG2 | G2.6 | <i>Phyllomedusa<br/>tomopterna</i> | 36 | KP122410 |
| Fr. Guiana | 14/04/20<br>13 | T2 | N4°31'45.8"<br>W52°09'05.6" | Near Patawa | 309 | FG2 | G2.7 | <i>Phyllomedusa<br/>tomopterna</i> | 38 | KP122411 |
| Fr. Guiana | 14/04/20<br>13 | T2 | N4°31'45.8"<br>W52°09'05.6" | Near Patawa | 309 | FG2 | G2.8 | <i>Phyllomedusa<br/>tomopterna</i> | 25 | KP122412 |

|            |            |    |                             |             |     |     |       |                                |       |          |
|------------|------------|----|-----------------------------|-------------|-----|-----|-------|--------------------------------|-------|----------|
| Fr. Guiana | 14/04/2013 | T2 | N4°31'45.8"<br>W52°09'05.6" | Near Patawa | 309 | FG2 | G2.9  | <i>Phyllomedusa tomopterna</i> | 27    | KP122404 |
| Fr. Guiana | 14/04/2013 | T2 | N4°31'45.8"<br>W52°09'05.6" | Near Patawa | 309 | FG2 | G2.10 | <i>Phyllomedusa tomopterna</i> | 26    | KP122413 |
| Fr. Guiana | 14/04/2013 | T2 | N4°31'45.8"<br>W52°09'05.6" | Near Patawa | 309 | FG2 | G2.11 | <i>Phyllomedusa tomopterna</i> | 25    | KP122414 |
| Fr. Guiana | 14/04/2013 | T2 | N4°31'45.8"<br>W52°09'05.6" | Near Patawa | 309 | FG2 | G2.12 | <i>Phyllomedusa tomopterna</i> | 28/29 | KP122415 |
| Fr. Guiana | 14/04/2013 | T2 | N4°31'45.8"<br>W52°09'05.6" | Near Patawa | 309 | FG2 | G2.13 | <i>Phyllomedusa tomopterna</i> | 28/29 | KP122416 |
| Fr. Guiana | 04/2013    | T3 | N4°32'36.9"<br>W52°9'08.1"  | Patawa      | 177 | FG3 | G3.1  | <i>Hypsiboas geographicus</i>  | 32    | KP122417 |
| Fr. Guiana | 04/2013    | T3 | N4°32'36.9"<br>W52°9'08.1"  | Patawa      | 177 | FG3 | G3.2  | <i>Hypsiboas geographicus</i>  | 25    | KP122418 |
| Fr. Guiana | 04/2013    | T3 | N4°32'36.9"<br>W52°9'08.1"  | Patawa      | 177 | FG3 | G3.3  | <i>Hypsiboas geographicus</i>  | 33    | KP122419 |

|            |                |    |                             |                      |    |     |      |                                                  |       |          |
|------------|----------------|----|-----------------------------|----------------------|----|-----|------|--------------------------------------------------|-------|----------|
| Fr. Guiana | 18/04/20<br>13 | T4 | N5°16'41.2"<br>W54°11'57.8" | Apatou-St<br>Laurent | 98 | FG4 | G4.1 | <i>Phyllomedusa<br/>tomopterna</i>               | 35    | KP122420 |
| Fr. Guiana | 18/04/20<br>13 | T4 | N5°16'41.2"<br>W54°11'57.8" | Apatou-St<br>Laurent | 98 | FG4 | G4.2 | <i>Hypsiboas crepitans</i>                       | 35    | KP122427 |
| Fr. Guiana | 18/04/20<br>13 | T4 | N5°16'41.2"<br>W54°11'57.8" | Apatou-St<br>Laurent | 98 | FG4 | G4.3 | <i>Phyllomedusa<br/>hypochondrialis</i>          | 38    | KP122428 |
| Fr. Guiana | 18/04/20<br>13 | T4 | N5°16'41.2"<br>W54°11'57.8" | Apatou-St<br>Laurent | 98 | FG4 | G4.4 | <i>Dendropsophus (Hyla)<br/>minutus (minuta)</i> | 39    | KP122439 |
| Fr. Guiana | 18/04/20<br>13 | T4 | N5°16'41.2"<br>W54°11'57.8" | Apatou-St<br>Laurent | 98 | FG4 | G4.5 | <i>Dendropsophus (Hyla)<br/>minutus (minuta)</i> | 30/31 | KP122440 |
| Fr. Guiana | 18/04/20<br>13 | T5 | N5°27'42.1"<br>W53°53'11.1" | Near St<br>Laurent   | 45 | FG5 | G5.1 | <i>Dendropsophus (Hyla)<br/>minutus (minuta)</i> | 35    | KP122429 |
| Fr. Guiana | 18/04/20<br>13 | T5 | N5°27'42.1"<br>W53°53'11.1" | Near St<br>Laurent   | 45 | FG5 | G5.2 | <i>Dendropsophus (Hyla)<br/>minutus (minuta)</i> | 39    | KP122430 |
| Fr. Guiana | 18/04/20<br>13 | T5 | N5°27'42.1"<br>W53°53'11.1" | Near St<br>Laurent   | 45 | FG5 | G5.3 | <i>Dendropsophus (Hyla)<br/>minutus (minuta)</i> | 37    | KP122431 |

|            |                |    |                             |                    |     |     |       |                                                        |       |          |
|------------|----------------|----|-----------------------------|--------------------|-----|-----|-------|--------------------------------------------------------|-------|----------|
| Fr. Guiana | 18/04/20<br>13 | T5 | N5°27'42.1"<br>W53°53'11.1" | Near St<br>Laurent | 45  | FG5 | G5.4  | <i>Dendropsophus (Hyla)</i><br><i>minutus (minuta)</i> | 31    | KP122432 |
| Fr. Guiana | 18/04/20<br>13 | T5 | N5°27'42.1"<br>W53°53'11.1" | Near St<br>Laurent | 45  | FG5 | G5.5  | <i>Dendropsophus (Hyla)</i><br><i>minutus (minuta)</i> | 29/30 | KP122433 |
| Fr. Guiana | 18/04/20<br>13 | T5 | N5°27'42.1"<br>W53°53'11.1" | Near St<br>Laurent | 45  | FG5 | G5.6  | <i>Dendropsophus (Hyla)</i><br><i>minutus (minuta)</i> | 26/27 | KP122434 |
| Fr. Guiana | 18/04/20<br>13 | T5 | N5°27'42.1"<br>W53°53'11.1" | Near St<br>Laurent | 45  | FG5 | G5.7  | <i>Dendropsophus (Hyla)</i><br><i>minutus (minuta)</i> | 41    | KP122435 |
| Fr. Guiana | 18/04/20<br>13 | T5 | N5°27'42.1"<br>W53°53'11.1" | Near St<br>Laurent | 45  | FG5 | G5.8  | <i>Dendropsophus (Hyla)</i><br><i>minutus (minuta)</i> | 34    | KP122436 |
| Fr. Guiana | 18/04/20<br>13 | T5 | N5°27'42.1"<br>W53°53'11.1" | Near St<br>Laurent | 45  | FG5 | G5.9  | <i>Dendropsophus (Hyla)</i><br><i>minutus (minuta)</i> | 41    | KP122437 |
| Fr. Guiana | 18/04/20<br>13 | T5 | N5°27'42.1"<br>W53°53'11.1" | Near St<br>Laurent | 45  | FG5 | G5.10 | <i>Dendropsophus (Hyla)</i><br><i>minutus (minuta)</i> | 31    | KP122438 |
| Fr. Guiana | 23/04/20<br>13 | T6 | N4°31'23.8"<br>W52°6'36.8"  | Patawa-Kaw         | 262 | FG6 | G6.1  | <i>Scinax elaeochroa</i>                               | 36/37 | KP122441 |



|            |                |    |                            |            |     |     |      |                                    |       |          |
|------------|----------------|----|----------------------------|------------|-----|-----|------|------------------------------------|-------|----------|
| Fr. Guiana | 23/04/20<br>13 | T6 | N4°31'23.8"<br>W52°6'36.8" | Patawa-Kaw | 262 | FG6 | G6.2 | <i>Phyllomedusa<br/>tomopterna</i> | 41    | KP122421 |
| Fr. Guiana | 23/04/20<br>13 | T6 | N4°31'23.8"<br>W52°6'36.8" | Patawa-Kaw | 262 | FG6 | G6.3 | <i>Phyllomedusa<br/>tomopterna</i> | 36    | KP122422 |
| Fr. Guiana | 23/04/20<br>13 | T6 | N4°31'23.8"<br>W52°6'36.8" | Patawa-Kaw | 262 | FG6 | G6.4 | <i>Phyllomedusa<br/>tomopterna</i> | 29/30 | KP122423 |
| Fr. Guiana | 23/04/20<br>13 | T6 | N4°31'23.8"<br>W52°6'36.8" | Patawa-Kaw | 262 | FG6 | G6.5 | <i>Phyllomedusa<br/>tomopterna</i> | 31    | KP122424 |
| Fr. Guiana | 23/04/20<br>13 | T6 | N4°31'23.8"<br>W52°6'36.8" | Patawa-Kaw | 262 | FG6 | G6.6 | <i>Phyllomedusa<br/>tomopterna</i> | 38    | KP122425 |
| Fr. Guiana | 23/04/20<br>13 | T6 | N4°31'23.8"<br>W52°6'36.8" | Patawa-Kaw | 262 | FG6 | G6.7 | <i>Phyllomedusa<br/>tomopterna</i> | 32/33 | KP122426 |
| Fr. Guiana | 26/04/20<br>13 | T8 | N4°32'30"<br>W52°09'00"    | Patawa     | 175 | FG7 | G8.1 | <i>Hypsiboas<br/>geographicus</i>  | 37/38 | KP122442 |
| Fr. Guiana | 26/04/20<br>13 | T8 | N4°32'30"<br>W52°09'00"    | Patawa     | 175 | FG7 | G8.2 | <i>Hypsiboas<br/>geographicus</i>  | 40    | KP122450 |

|            |                |    |                         |        |     |     |       |                                   |       |          |
|------------|----------------|----|-------------------------|--------|-----|-----|-------|-----------------------------------|-------|----------|
| Fr. Guiana | 26/04/20<br>13 | T8 | N4°32'30"<br>W52°09'00" | Patawa | 175 | FG7 | G8.3  | <i>Hypsiboas<br/>geographicus</i> | 40    | KP122443 |
| Fr. Guiana | 26/04/20<br>13 | T8 | N4°32'30"<br>W52°09'00" | Patawa | 175 | FG7 | G8.4  | <i>Hypsiboas<br/>geographicus</i> | 40    | KP122444 |
| Fr. Guiana | 26/04/20<br>13 | T8 | N4°32'30"<br>W52°09'00" | Patawa | 175 | FG7 | G8.5  | <i>Hypsiboas<br/>geographicus</i> | 38/39 | KP122445 |
| Fr. Guiana | 26/04/20<br>13 | T8 | N4°32'30"<br>W52°09'00" | Patawa | 175 | FG7 | G8.6  | <i>Hypsiboas<br/>geographicus</i> | 37/38 | KP122446 |
| Fr. Guiana | 26/04/20<br>13 | T8 | N4°32'30"<br>W52°09'00" | Patawa | 175 | FG7 | G8.7  | <i>Hypsiboas<br/>geographicus</i> | 37/38 | KP122447 |
| Fr. Guiana | 26/04/20<br>13 | T8 | N4°32'30"<br>W52°09'00" | Patawa | 175 | FG7 | G8.8  | <i>Hypsiboas<br/>geographicus</i> | 38/39 | KP122448 |
| Fr. Guiana | 26/04/20<br>13 | T8 | N4°32'30"<br>W52°09'00" | Patawa | 175 | FG7 | G8.9  | <i>Hypsiboas<br/>geographicus</i> | 38/39 | KP122449 |
| Fr. Guiana | 26/04/20<br>13 | T8 | N4°32'30"<br>W52°09'00" | Patawa | 175 | FG7 | G8.10 | <i>Hypsiboas<br/>geographicus</i> | 38/39 | KP122451 |

|            |                |                |                          |                                              |     |     |       |                                   |       |          |
|------------|----------------|----------------|--------------------------|----------------------------------------------|-----|-----|-------|-----------------------------------|-------|----------|
| Fr. Guiana | 26/04/20<br>13 | T8             | N4°32'30"<br>W52°09'00"  | Patawa                                       | 175 | FG7 | G8.11 | <i>Hypsiboas<br/>geographicus</i> | 38/39 | KP122452 |
| Fr. Guiana | 17/04/20<br>10 | T1 -<br>Patawa | N04°32'45"<br>W52°09'01" | Small pool in<br>drying out,<br>rocky stream | 220 | FG8 | T1.1  | <i>Hypsiboas<br/>geographicus</i> | 42    | KP122373 |
| Fr. Guiana | 17/04/20<br>10 | T3 -<br>Patawa | N04°32'45"<br>W52°09'01" | Small pool in<br>drying out,<br>rocky stream | 220 | FG8 | T3.1  | <i>Hypsiboas<br/>geographicus</i> | 25    | KP122374 |
| Fr. Guiana | 17/04/20<br>10 | T3 -<br>Patawa | N04°32'45"<br>W52°09'01" | Small pool in<br>drying out,<br>rocky stream | 220 | FG8 | T3.3  | <i>Hypsiboas<br/>geographicus</i> | 25    | KP122375 |
| Fr. Guiana | 17/04/20<br>10 | T3 -<br>Patawa | N04°32'45"<br>W52°09'01" | Small pool in<br>drying out,<br>rocky stream | 220 | FG8 | T3.4  | <i>Hypsiboas<br/>geographicus</i> | 25    | KP122376 |
| Fr. Guiana | 17/04/20<br>10 | T3 -<br>Patawa | N04°32'45"<br>W52°09'01" | Small pool in<br>drying out,<br>rocky stream | 220 | FG8 | T3.5  | <i>Hypsiboas<br/>geographicus</i> | 25    | KP122377 |
| Fr. Guiana | 17/04/20<br>10 | T3 -<br>Patawa | N04°32'45"<br>W52°09'01" | Small pool in<br>drying out,<br>rocky stream | 220 | FG8 | T3.6  | <i>Hypsiboas<br/>geographicus</i> | 25    | KP122378 |
| Fr. Guiana | 17/04/20<br>10 | T3 -<br>Patawa | N04°32'45"<br>W52°09'01" | Small pool in<br>drying out,<br>rocky stream | 220 | FG8 | T3.7  | <i>Hypsiboas<br/>geographicus</i> | 25    | KP122379 |

|            |                |                |                          |                                              |     |     |       |                                   |       |          |
|------------|----------------|----------------|--------------------------|----------------------------------------------|-----|-----|-------|-----------------------------------|-------|----------|
| Fr. Guiana | 17/04/20<br>10 | T3 -<br>Patawa | N04°32'45"<br>W52°09'01" | Small pool in<br>drying out,<br>rocky stream | 220 | FG8 | T3.8  | <i>Hypsiboas<br/>geographicus</i> | 25    | KP122380 |
| Fr. Guiana | 17/04/20<br>10 | T3 -<br>Patawa | N04°32'45"<br>W52°09'01" | Small pool in<br>drying out,<br>rocky stream | 220 | FG8 | T3.9  | <i>Hypsiboas<br/>geographicus</i> | 25    | KP122381 |
| Fr. Guiana | 17/04/20<br>10 | T3 -<br>Patawa | N04°32'45"<br>W52°09'01" | Small pool in<br>drying out,<br>rocky stream | 220 | FG8 | T3.10 | <i>Hypsiboas<br/>geographicus</i> | 25    | KP122390 |
| Fr. Guiana | 17/04/20<br>10 | T3 -<br>Patawa | N04°32'45"<br>W52°09'01" | Small pool in<br>drying out,<br>rocky stream | 220 | FG8 | T3.11 | <i>Hypsiboas<br/>geographicus</i> | 25    | KP122391 |
| Fr. Guiana | 17/04/20<br>10 | T3 -<br>Patawa | N04°32'45"<br>W52°09'01" | Small pool in<br>drying out,<br>rocky stream | 220 | FG8 | T3.12 | <i>Hypsiboas<br/>geographicus</i> | 25    | KP122392 |
| Fr. Guiana | 17/04/20<br>10 | T3 -<br>Patawa | N04°32'45"<br>W52°09'01" | Small pool in<br>drying out,<br>rocky stream | 220 | FG8 | T3.13 | <i>Hypsiboas<br/>geographicus</i> | 25    | KP122393 |
| Fr. Guiana | 17/04/20<br>10 | T3 -<br>Patawa | N04°32'45"<br>W52°09'01" | Small pool in<br>drying out,<br>rocky stream | 220 | FG8 | T3.14 | <i>Hypsiboas<br/>geographicus</i> | 25    | KP122397 |
| Fr. Guiana | 17/04/20<br>10 | T4 -<br>Patawa | N04°32'45"<br>W52°09'01" | Small pool in<br>drying out,<br>rocky stream | 220 | FG8 | T4.1  | <i>Allobates femoralis</i>        | 28/29 | KP122382 |

|            |                |                |                          |                                              |     |     |      |                                    |       |          |
|------------|----------------|----------------|--------------------------|----------------------------------------------|-----|-----|------|------------------------------------|-------|----------|
| Fr. Guiana | 17/04/20<br>10 | T5 -<br>Patawa | N04°32'45"<br>W52°09'01" | Small pool in<br>drying out,<br>rocky stream | 220 | FG8 | T5.1 | <i>Hyla helenae</i>                | 27    | KP122383 |
| Fr. Guiana | 17/04/20<br>10 | T5 -<br>Patawa | N04°32'45"<br>W52°09'01" | Small pool in<br>drying out,<br>rocky stream | 220 | FG8 | T5.2 | <i>Hyla helenae</i>                | 25    | KP122384 |
| Fr. Guiana | 17/04/20<br>10 | T5 -<br>Patawa | N04°32'45"<br>W52°09'01" | Small pool in<br>drying out,<br>rocky stream | 220 | FG8 | T5.4 | <i>Hyla helenae</i>                | 25    | KP122385 |
| Fr. Guiana | 17/04/20<br>10 | T5 -<br>Patawa | N04°32'45"<br>W52°09'01" | Small pool in<br>drying out,<br>rocky stream | 220 | FG8 | T5.5 | <i>Hyla helenae</i>                | 25    | KP122386 |
| Fr. Guiana | 17/04/20<br>10 | T5 -<br>Patawa | N04°32'45"<br>W52°09'01" | Small pool in<br>drying out,<br>rocky stream | 220 | FG8 | T5.6 | <i>Hyla helenae</i>                | 25    | KP122398 |
| Fr. Guiana | 17/04/20<br>10 | T5 -<br>Patawa | N04°32'45"<br>W52°09'01" | Small pool in<br>drying out,<br>rocky stream | 220 | FG8 | T5.8 | <i>Hyla helenae</i>                | 25    | KP122394 |
| Fr. Guiana | 17/04/20<br>10 | T5 -<br>Patawa | N04°32'45"<br>W52°09'01" | Small pool in<br>drying out,<br>rocky stream | 220 | FG8 | T5.9 | <i>Hyla helenae</i>                | 25    | KP122395 |
| Fr. Guiana | 17/04/20<br>10 | T6 -<br>Patawa | N04°32'45"<br>W52°09'01" | Small pool in<br>drying out,<br>rocky stream | 220 | FG8 | T6.2 | <i>Phyllomedusa<br/>tomopterna</i> | 26/27 | KP122387 |

|            |                |                        |                           |                                                           |      |     |      |                                    |       |          |
|------------|----------------|------------------------|---------------------------|-----------------------------------------------------------|------|-----|------|------------------------------------|-------|----------|
| Fr. Guiana | 17/04/20<br>10 | T6 -<br>Patawa         | N04°32'45"<br>W52°09'01"  | Small pool in<br>drying out,<br>rocky stream              | 220  | FG8 | T6.3 | <i>Phyllomedusa<br/>tomopterna</i> | 26/27 | KP122388 |
| Fr. Guiana | 17/04/20<br>10 | T6 -<br>Patawa         | N04°32'45"<br>W52°09'01"  | Small pool in<br>drying out,<br>rocky stream              | 220  | FG8 | T6.4 | <i>Phyllomedusa<br/>tomopterna</i> | 26/27 | KP122389 |
| Fr. Guiana | 17/04/20<br>10 | T6 -<br>Patawa         | N04°32'45"<br>W52°09'01"  | Small pool in<br>drying out,<br>rocky stream              | 220  | FG8 | T6.5 | <i>Phyllomedusa<br/>tomopterna</i> | 26/27 | KP122396 |
| Cameroon   | 18/09/20<br>10 | Near<br>Tombel,<br>SWP | N4°42'9.5"<br>E9°38'20.1" | Marsh<br>wetland<br>surrounded<br>by cocoa<br>plantations | 347  | CM1 | A1   | <i>Xenopus tropicalis</i>          | 66*   | KP122359 |
| Cameroon   | 18/09/20<br>10 | Near<br>Tombel,<br>SWP | N4°42'9.5"<br>E9°38'20.1" | Marsh<br>wetland<br>surrounded<br>by cocoa<br>plantations | 347  | CM1 | A2   | <i>Xenopus tropicalis</i>          | 66*   | KP122358 |
| Cameroon   | 18/09/20<br>10 | Near<br>Tombel,<br>SWP | N4°42'9.5"<br>E9°38'20.1" | Marsh<br>wetland<br>surrounded<br>by cocoa<br>plantations | 347  | CM1 | A3   | <i>Xenopus tropicalis</i>          | 64*   | KP122365 |
| Cameroon   | 18/09/20<br>10 | Near<br>Tombel,<br>SWP | N4°42'9.5"<br>E9°38'20.1" | Marsh<br>wetland<br>surrounded<br>by cocoa<br>plantations | 347  | CM1 | A4   | <i>Xenopus tropicalis</i>          | 64*   | KP122366 |
| Cameroon   | 27/07/20<br>10 | Lake<br>Oku            | N6°12'3.3"<br>E10°27'2.6" | Lake                                                      | 2225 | CM2 | A5   | <i>Xenopus tropicalis</i>          | 53*   | KP122367 |

|          |            |             |                             |                                                              |      |     |     |                                      |       |          |
|----------|------------|-------------|-----------------------------|--------------------------------------------------------------|------|-----|-----|--------------------------------------|-------|----------|
| Cameroon | 28/07/2010 | Lake Oku    | N6°12'3.3"<br>E10°27'2.6"   | Lake                                                         | 2225 | CM2 | A6  | <i>Xenopus tropicalis</i>            | 52*   | KP122368 |
| Cameroon | 29/07/2010 | Lake Oku    | N6°12'3.3"<br>E10°27'2.6"   | Lake                                                         | 2225 | CM2 | A7  | <i>Xenopus tropicalis</i>            | 55*   | KP122369 |
| Cameroon | 25/05/2009 | Lake Oku    | N6°12'3.3"<br>E10°27'2.6"   | Lake                                                         | 2225 | CM3 | A8  | <i>Astylosternus schioetzi</i>       | 27    | KP122370 |
| Cameroon | 17/04/2009 | Lake Oku    | N6°12'3.3"<br>E10°27'2.6"   | Lake                                                         | 2225 | CM4 | A9  | <i>Astylosternus schioetzi</i>       | 41    | KP122371 |
| Cameroon | 17/04/2009 | Lake Oku    | N6°12'3.3"<br>E10°27'2.6"   | Lake                                                         | 2225 | CM4 | A10 | <i>Astylosternus schioetzi</i>       | 26    | KP122372 |
| Cameroon | 31/05/2009 | Ngashie-Oku | N6°14'19.9"<br>E10°30'19.3" | Stream in small holder agriculture and eucalyptus plantation | 1956 | CM5 | A13 | <i>Astylosternus schioetzi</i>       | 25    | KP122352 |
| Cameroon | 31/05/2009 | Ngashie-Oku | N6°14'19.9"<br>E10°30'19.3" | Stream in small-holder agriculture and eucalyptus plantation | 1956 | CM5 | A16 | <i>Astylosternus schioetzi</i>       | ND    | KP122354 |
| Cameroon | 18/05/2009 | Mt. Oku     | N6° 10'36.6"<br>E10°30'1.8" | Stream in forest-grassland transition                        | 2751 | CM6 | A14 | <i>Phrynobatrachus steindachneri</i> | 37/40 | KP122353 |

|          |               |                        |                             |                                         |      |      |     |                                 |       |          |
|----------|---------------|------------------------|-----------------------------|-----------------------------------------|------|------|-----|---------------------------------|-------|----------|
| Cameroon | 26/08/2006    | Anyafouma, NWR         | N6°13'57.8"<br>E10°25'13.5" | Stream in primary mountain forest       | 2481 | CM7  | A15 | <i>Phrynobatrachus</i> sp.      | 31/34 | KP122338 |
| Cameroon | 24/11/2008    | Near Buea, Mt Cameroon | N4°10'30.6"<br>E9°12'15.6"  | Small stream in degraded forest         | 1840 | CM8  | A18 | <i>Hyperolius riggenbachi</i>   | 25    | KP122356 |
| Cameroon | 21/05/2009    | Elemighong, NWR        | N6°12'58.0"<br>E10°23'37.6" | Abandoned fish pond                     | 1793 | CM9  | A19 | <i>Hyperolius riggenbachi</i>   | 27/28 | KP122357 |
| Cameroon | 21/05/2009    | Elemighong, NWR        | N6°12'58.0"<br>E10°23'37.6" | Abandoned fish pond                     | 1793 | CM9  | A20 | <i>Kassina maculosa</i>         | 27/28 | KP122364 |
| Cameroon | 21/05/2009    | Elemighong, NWR        | N6°12'58.0"<br>E10°23'37.6" | Abandoned fish pond                     | 1793 | CM9  | A17 | <i>Hyperolius riggenbachi</i>   | 25/26 | KP122355 |
| Cameroon | 20-22/05/2009 | Elemighong, NWR        | N6°12'58"<br>E10°23'37.6"   | Abandoned fish pond                     | 1793 | CM9  | A11 | <i>Leptopelis vermiculatus</i>  | 37    | KP122350 |
| Cameroon | 20-22/05/2009 | Elemighong, NWR        | N6°12'58"<br>E10°23'37.6"   | Abandoned fish pond                     | 1793 | CM9  | A12 | <i>Hyperolius lamottei</i>      | 38    | KP122351 |
| Cameroon | 14/04/2012    | Kakpenyi, Mamfe        | N6°14'41.3"<br>E9°31'31.6"  | Small river next to village, c. 3m wide | 420  | CM10 | A38 | <i>Trichobatrachus robustus</i> | 39/40 | KP122507 |



|          |            |                  |                            |                                               |     |      |     |                                       |         |          |
|----------|------------|------------------|----------------------------|-----------------------------------------------|-----|------|-----|---------------------------------------|---------|----------|
| Cameroon | 14/04/2012 | Kakpenyi, Mamfe  | N6°14'41.3"<br>E9°31'31.6" | Small river next to village, c. 3m wide       | 420 | CM10 | A48 | <i>Trichobatrachus robustus</i>       | 39/40   | KP122508 |
| Cameroon | 14/04/2012 | Kakpenyi, Mamfe  | N6°14'41.3"<br>E9°31'31.6" | Small river next to village, c. 3m wide       | 420 | CM10 | A46 | <i>Trichobatrachus robustus</i>       | 42      | KP122506 |
| Cameroon | 16/04/2012 | Makamu ne, Mamfe | N6°9'25.5"<br>E9°31'1.6"   | River in agricultural landscape, c. 5m wide   | 515 | CM11 | A53 | <i>Hylarana (Amnirana) albolabris</i> | 25      | KP122519 |
| Cameroon | 18/04/2012 | Tinta, Mamfe     | N6°16'57.2"<br>E9°30'47.7" | River in agricultural landscape               | 640 | CM12 | A47 | <i>Hylarana (Amnirana) albolabris</i> | Unknown | KP122503 |
| Cameroon | 18/04/2012 | Tinta, Mamfe     | N6°16'57.2"<br>E9°30'47.7" | River in agricultural landscape, c. 5m wide   | 640 | CM12 | A49 | <i>Hylarana (Amnirana) albolabris</i> | Unknown | KP122504 |
| Cameroon | 18/04/2012 | Tinta, Mamfe     | N6°16'57.2"<br>E9°30'47.7" | River in agricultural landscape, c. 5m wide   | 640 | CM12 | A50 | <i>Hylarana (Amnirana) albolabris</i> | Unknown | KP122505 |
| Cameroon | 13/04/2012 | Ote, Mamfe       | N6°10'6.1"<br>E9°30'25.5"  | Very small stream in mixed forest/agriculture | 164 | CM13 | A40 | <i>Amietophrynus (Bufo) regularis</i> | 27/28   | KP122510 |
| Cameroon | 13/04/2012 | Ote, Mamfe       | N6°10'6.1"<br>E9°30'25.5"  | Very small stream in mixed forest/agriculture | 164 | CM13 | A52 | <i>Amietophrynus (Bufo) regularis</i> | 32/33   | KP122511 |

|          |            |                 |                           |                                               |     |      |     |                                       |    |          |
|----------|------------|-----------------|---------------------------|-----------------------------------------------|-----|------|-----|---------------------------------------|----|----------|
| Cameroon | 13/04/2012 | Ote, Mamfe      | N6°10'6.1"<br>E9°30'25.5" | Very small stream in mixed forest/agriculture | 164 | CM13 | A54 | <i>Amietophrynus (Bufo) regularis</i> | 25 | KP122512 |
| Cameroon | 13/04/2012 | Ote, Mamfe      | N6°10'6.1"<br>E9°30'25.5" | Very small stream in mixed forest/agriculture | 164 | CM13 | A55 | <i>Amietophrynus (Bufo) regularis</i> | 36 | KP122509 |
| Cameroon | 13/04/2012 | Ote, Mamfe      | N6°10'6.1"<br>E9°30'25.5" | Very small stream in mixed forest/agriculture | 164 | CM13 | A56 | <i>Amietophrynus (Bufo) regularis</i> | 29 | KP122513 |
| Cameroon | 16/04/2012 | Makamune, Mamfe | N6°9'25.5"<br>E9°31'1.6"  | River in agricultural landscape, c. 5m wide   | 515 | CM14 | A57 | <i>Hylarana (Amnirana) albolabris</i> | 39 | KP122518 |
| Cameroon | 16/04/2012 | Makamune, Mamfe | N6°9'25.5"<br>E9°31'1.6"  | River in agricultural landscape, c. 5m wide   | 515 | CM14 | A58 | <i>Hylarana (Amnirana) albolabris</i> | 37 | KP122517 |
| Cameroon | 16/04/2012 | Makamune, Mamfe | N6°9'25.5"<br>E9°31'1.6"  | River in agricultural landscape, c. 5m wide   | 515 | CM14 | A59 | <i>Hylarana (Amnirana) albolabris</i> | 25 | KP122516 |
| Cameroon | 16/04/2012 | Makamune, Mamfe | N6°9'25.5"<br>E9°31'1.6"  | River in agricultural landscape, c. 5m wide   | 515 | CM14 | A60 | <i>Hylarana (Amnirana) albolabris</i> | 39 | KP122515 |
| Cameroon | 16/04/2012 | Makamune, Mamfe | N6°9'25.5"<br>E9°31'1.6"  | River in agricultural landscape, c. 5m wide   | 515 | CM14 | A61 | <i>Hylarana (Amnirana) albolabris</i> | 25 | KP122514 |

|          |                |                         |                         |                                    |      |     |     |                                        |    |          |
|----------|----------------|-------------------------|-------------------------|------------------------------------|------|-----|-----|----------------------------------------|----|----------|
| Tanzania | winter<br>1998 | Udzung<br>wa<br>Kihanga | S8°22'24"<br>E35°58'43" | Stream<br>mountain,<br>rain forest | 1648 | TZ1 | A21 | <i>Amietia (Afrana)<br/>angolensis</i> | 25 | KP122339 |
| Tanzania | winter<br>1998 | Udzung<br>wa<br>Kihanga | S8°22'24"<br>E35°58'43" | Stream<br>mountain,<br>rain forest | 1648 | TZ1 | A22 | <i>Amietia (Afrana)<br/>angolensis</i> | 25 | KP122363 |
| Tanzania | winter<br>1998 | Udzung<br>wa<br>Kihanga | S8°22'24"<br>E35°58'43" | Stream<br>mountain,<br>rain forest | 1648 | TZ1 | A23 | <i>Amietia (Afrana)<br/>angolensis</i> | 25 | KP122340 |
| Tanzania | winter<br>1998 | Udzung<br>wa<br>Kihanga | S8°22'24"<br>E35°58'43" | Stream<br>mountain,<br>rain forest | 1648 | TZ1 | A24 | <i>Amietia (Afrana)<br/>angolensis</i> | 25 | KP122341 |
| Tanzania | winter<br>1998 | Udzung<br>wa<br>Kihanga | S8°22'24"<br>E35°58'43" | Stream<br>mountain,<br>rain forest | 1648 | TZ1 | A25 | <i>Leptopelis barbouri</i>             | 25 | KP122342 |
| Tanzania | winter<br>1998 | Udzung<br>wa<br>Kihanga | S8°22'24"<br>E35°58'43" | Stream<br>mountain,<br>rain forest | 1648 | TZ1 | A26 | <i>Leptopelis barbouri</i>             | 25 | KP122361 |
| Tanzania | winter<br>1998 | Udzung<br>wa<br>Kihanga | S8°22'24"<br>E35°58'43" | Stream<br>mountain,<br>rain forest | 1648 | TZ1 | A27 | <i>Leptopelis barbouri</i>             | 25 | KP122343 |
| Tanzania | winter<br>1998 | Udzung<br>wa<br>Kihanga | S8°22'24"<br>E35°58'43" | Stream<br>mountain,<br>rain forest | 1648 | TZ1 | A28 | <i>Leptopelis barbouri</i>             | 42 | KP122362 |

|          |                       |                         |                                |                                                         |      |     |       |                                   |       |          |
|----------|-----------------------|-------------------------|--------------------------------|---------------------------------------------------------|------|-----|-------|-----------------------------------|-------|----------|
| Tanzania | winter<br>1998        | Udzung<br>wa<br>Kihanga | S8°22'24"<br>E35°58'43"        | Stream<br>mountain,<br>rain forest                      | 1648 | TZ1 | A29   | <i>Leptopelis barbouri</i>        | 41    | KP122344 |
| Tanzania | winter<br>1998        | Udzung<br>wa<br>Kihanga | S8°22'24"<br>E35°58'43"        | Stream<br>mountain,<br>rain forest                      | 1648 | TZ1 | A30   | <i>Leptopelis barbouri</i>        | 41    | KP122360 |
| Tanzania | winter<br>1998        | Udzung<br>wa<br>Kihanga | S8°22'24"<br>E35°58'43"        | Stream<br>mountain,<br>rain forest                      | 1648 | TZ1 | A31   | <i>Leptopelis</i> sp.             | 25/26 | KP122345 |
| Tanzania | winter<br>1998        | Udzung<br>wa<br>Kihanga | S8°22'24"<br>E35°58'43"        | Stream<br>mountain,<br>rain forest                      | 1648 | TZ1 | A32   | <i>Leptopelis</i> sp.             | 25/26 | KP122346 |
| Tanzania | winter<br>1998        | Udzung<br>wa<br>Kihanga | S8°22'24"<br>E35°58'43"        | Stream<br>mountain,<br>rain forest                      | 1648 | TZ1 | A33   | <i>Leptopelis</i> sp.             | 25/26 | KP122347 |
| Tanzania | winter<br>1998        | Udzung<br>wa<br>Kihanga | S8°22'24"<br>E35°58'43"        | Stream<br>mountain,<br>rain forest                      | 1648 | TZ1 | A34   | <i>Leptopelis</i> sp.             | 25/26 | KP122348 |
| Tanzania | winter<br>1998        | Udzung<br>wa<br>Kihanga | S8°22'24"<br>E35°58'43"        | Stream<br>mountain,<br>rain forest                      | 1648 | TZ1 | A35   | <i>Leptopelis barbouri</i>        | 28/29 | KP122349 |
| São Tomé | 30-<br>31/10/20<br>11 | Bom<br>Sucesso,         | N00°17'19.44"<br>E06°36'44.88" | Puddle on the<br>road in front<br>of botanic<br>gardens | 1153 | ST1 | CZ1.1 | <i>Phrynobatrachus<br/>dispar</i> | <30   | KP122497 |

|            |               |                                                |                                |                                                |      |     |       |                                     |     |          |
|------------|---------------|------------------------------------------------|--------------------------------|------------------------------------------------|------|-----|-------|-------------------------------------|-----|----------|
| São Tomé   | 30-31/10/2011 | Bom Sucesso                                    | N00°17'19.44"<br>E06°36'44.88" | Puddle on the road in front of botanic gardens | 1153 | ST1 | CZ1.2 | <i>Phrynobatrachus dispar</i>       | <28 | KP122498 |
| São Tomé   | 30-31/10/2011 | Bom Sucesso                                    | N00°17'19.44"<br>E06°36'44.88" | Puddle on the road in front of botanic gardens | 1153 | ST1 | CZ1.3 | <i>Phrynobatrachus dispar</i>       | <30 | KP122499 |
| São Tomé   | 30-31/10/2011 | Bom Sucesso                                    | N00°17'19.44"<br>E06°36'44.88" | Puddle on the road in front of botanic gardens | 1153 | ST1 | CZ1.4 | <i>Phrynobatrachus dispar</i>       | <28 | KP122500 |
| Czech Rep. | 2003-2005     | Šnejdlík pond, Vrbenské rybníky, Č. Budějovice | N49°00'20"<br>E14°25'04"       |                                                | 381  | CZ1 | CZ2   | <i>Pelophylax (Rana) ridibundus</i> | <39 | KP122502 |
| Czech Rep. | 2003-2005     | Šnejdlík pond, Vrbenské rybníky, Č. Budějovice | N49°00'20"<br>E14°25'04"       |                                                | 381  | CZ1 | CZ3   | <i>Pelophylax (Rana) ridibundus</i> | <25 | KP122501 |
| Czech Rep. | 25/06/2004    | Zajččí potok, Brno                             | N49°14'15"<br>E16°36'23"       |                                                | 300  | CZ2 | NemE1 | <i>Rana temporaria</i>              | ND  | KP122493 |
| Czech Rep. | 25/06/2004    | Zajččí potok, Brno                             | N49°14'15"<br>E16°36'23"       |                                                | 300  | CZ2 | NemE2 | <i>Rana temporaria</i>              | ND  | KP122494 |

|            |            |                                     |                          |     |     |       |                        |       |          |
|------------|------------|-------------------------------------|--------------------------|-----|-----|-------|------------------------|-------|----------|
| Czech Rep. | 25/06/2004 | Zajěčí potok, Brno                  | N49°14'15"<br>E16°36'23" | 300 | CZ2 | NemE3 | <i>Rana temporaria</i> | ND    | KP122495 |
| Czech Rep. | 15/07/2004 | Zajěčí potok, Brno                  | N49°14'15"<br>E16°36'23" | 300 | CZ3 | NemE4 | <i>Hyla arborea</i>    | ND    | KP122496 |
| UK         | 2/05/2013  | NHM pond, Cromwell road, London, UK | N51°29'45"<br>W0°10'42"  | 17  | UK1 | NHM1  | <i>Bufo bufo</i>       | 29/30 | KP122453 |
| UK         | 2/05/2013  | NHM pond, Cromwell road, London, UK | N51°29'45"<br>W0°10'42"  | 17  | UK1 | NHM2  | <i>Bufo bufo</i>       | 29/30 | KP122454 |
| UK         | 2/05/2013  | NHM pond, Cromwell road, London, UK | N51°29'45"<br>W0°10'42"  | 17  | UK1 | NHM3  | <i>Bufo bufo</i>       | 29/30 | KP122455 |
| UK         | 2/05/2013  | NHM pond, Cromwell road, London, UK | N51°29'45"<br>W0°10'42"  | 17  | UK1 | NHM4  | <i>Bufo bufo</i>       | 29/30 | KP122456 |
| UK         | 2/05/2013  | NHM pond, Cromwell road, London, UK | N51°29'45"<br>W0°10'42"  | 17  | UK1 | NHM5  | <i>Rana temporaria</i> | 29/30 | KP122469 |

|    |            |                                     |                         |    |     |       |                        |       |          |
|----|------------|-------------------------------------|-------------------------|----|-----|-------|------------------------|-------|----------|
| UK | 2/05/2013  | NHM pond, Cromwell road, London, UK | N51°29'45"<br>W0°10'42" | 17 | UK1 | NHM6  | <i>Rana temporaria</i> | 29/30 | KP122470 |
| UK | 2/05/2013  | NHM pond, Cromwell road, London, UK | N51°29'45"<br>W0°10'42" | 17 | UK1 | NHM7  | <i>Rana temporaria</i> | 29/30 | KP122471 |
| UK | 2/05/2013  | NHM pond, Cromwell road, London, UK | N51°29'45"<br>W0°10'42" | 17 | UK1 | NHM8  | <i>Rana temporaria</i> | 29/30 | KP122472 |
| UK | 2/05/2013  | NHM pond, Cromwell road, London, UK | N51°29'45"<br>W0°10'42" | 17 | UK1 | NHM9  | <i>Bufo bufo</i>       | 29/30 | KP122457 |
| UK | 15/05/2013 | NHM pond, Cromwell road, London, UK | N51°29'45"<br>W0°10'42" | 17 | UK2 | NHM16 | <i>Bufo bufo</i>       | 30/31 | KP122458 |
| UK | 15/05/2013 | NHM pond, Cromwell road, London, UK | N51°29'45"<br>W0°10'42" | 17 | UK2 | NHM17 | <i>Bufo bufo</i>       | 30/31 | KP122459 |
| UK | 15/05/2013 | NHM pond, Cromwell road, London, UK | N51°29'45"<br>W0°10'42" | 17 | UK2 | NHM18 | <i>Bufo bufo</i>       | 30/31 | KP122460 |

UK

|    |                |                                                     |                         |    |     |       |                  |       |          |
|----|----------------|-----------------------------------------------------|-------------------------|----|-----|-------|------------------|-------|----------|
| UK | 15/05/20<br>13 | NHM<br>pond,<br>Cromwel<br>l road,<br>London,<br>UK | N51°29'45"<br>W0°10'42" | 17 | UK2 | NHM19 | <i>Bufo bufo</i> | 30/31 | KP122461 |
| UK | 15/05/20<br>13 | NHM<br>pond,<br>Cromwel<br>l road,<br>London,<br>UK | N51°29'45"<br>W0°10'42" | 17 | UK2 | NHM20 | <i>Bufo bufo</i> | 30/31 | KP122462 |
| UK | 15/05/20<br>13 | NHM<br>pond,<br>Cromwel<br>l road,<br>London,<br>UK | N51°29'45"<br>W0°10'42" | 17 | UK2 | NHM21 | <i>Bufo bufo</i> | 30/31 | KP122463 |
| UK | 15/05/20<br>13 | NHM<br>pond,<br>Cromwel<br>l road,<br>London,<br>UK | N51°29'45"<br>W0°10'42" | 17 | UK2 | NHM22 | <i>Bufo bufo</i> | 30/31 | KP122464 |
| UK | 15/05/20<br>13 | NHM<br>pond,<br>Cromwel<br>l road,<br>London,<br>UK | N51°29'45"<br>W0°10'42" | 17 | UK2 | NHM23 | <i>Bufo bufo</i> | 30/31 | KP122465 |
| UK | 15/05/20<br>13 | NHM<br>pond,<br>Cromwel<br>l road,<br>London,<br>UK | N51°29'45"<br>W0°10'42" | 17 | UK2 | NHM24 | <i>Bufo bufo</i> | 30/31 | KP122466 |



|    |            |                                     |                             |     |     |       |                        |       |          |
|----|------------|-------------------------------------|-----------------------------|-----|-----|-------|------------------------|-------|----------|
| UK | 15/05/2013 | NHM pond, Cromwell road, London, UK | N51°29'45"<br>W0°10'42"     | 17  | UK2 | NHM25 | <i>Bufo bufo</i>       | 30/31 | KP122467 |
| UK | 15/05/2013 | NHM pond, Cromwell road, London, UK | N51°29'45"<br>W0°10'42"     | 17  | UK2 | NHM26 | <i>Bufo bufo</i>       | 30/31 | KP122468 |
| UK | 1/05/2013  | Sevenoaks pond London, UK           | N51°16'14.5"<br>E0°11'22.1" | 184 | UK3 | SL1   | <i>Rana temporaria</i> | 24    | KP122474 |
| UK | 1/05/2013  | Sevenoaks pond, Kent, UK            | N51°16'14.5"<br>E0°11'22.1" | 184 | UK3 | SL2   | <i>Rana temporaria</i> | 24    | KP122475 |
| UK | 1/05/2013  | Sevenoaks pond, Kent, UK            | N51°16'14.5"<br>E0°11'22.1" | 184 | UK3 | SL3   | <i>Rana temporaria</i> | 24    | KP122476 |
| UK | 1/05/2013  | Sevenoaks pond, Kent, UK            | N51°16'14.5"<br>E0°11'22.1" | 184 | UK3 | SL4   | <i>Rana temporaria</i> | 24    | KP122477 |
| UK | 1/05/2013  | Sevenoaks pond, Kent, UK            | N51°16'14.5"<br>E0°11'22.1" | 184 | UK3 | SL5   | <i>Rana temporaria</i> | 24    | KP122478 |
| UK | 1/05/2013  | Sevenoaks pond, Kent, UK            | N51°16'14.5"<br>E0°11'22.1" | 184 | UK3 | SL6   | <i>Rana temporaria</i> | 24    | KP122479 |

|    |            |                          |                             |     |     |      |                        |    |          |
|----|------------|--------------------------|-----------------------------|-----|-----|------|------------------------|----|----------|
| UK | 1/05/2013  | Sevenoaks pond, Kent, UK | N51°16'14.5"<br>E0°11'22.1" | 184 | UK3 | SL7  | <i>Rana temporaria</i> | 33 | KP122480 |
| UK | 15/05/2013 | Sevenoaks pond, Kent, UK | N51°16'14.5"<br>E0°11'22.1" | 184 | UK4 | SL8  | <i>Rana temporaria</i> | 32 | KP122481 |
| UK | 15/05/2013 | Sevenoaks pond, Kent, UK | N51°16'14.5"<br>E0°11'22.1" | 184 | UK4 | SL9  | <i>Rana temporaria</i> | 32 | KP122482 |
| UK | 15/05/2013 | Sevenoaks pond, Kent, UK | N51°16'14.5"<br>E0°11'22.1" | 184 | UK4 | SL10 | <i>Rana temporaria</i> | 30 | KP122473 |
| UK | 15/05/2013 | Sevenoaks pond, Kent, UK | N51°16'14.5"<br>E0°11'22.1" | 184 | UK4 | SL11 | <i>Rana temporaria</i> | 31 | KP122483 |
| UK | 08/07/2013 | Sevenoaks pond, Kent, UK | N51°16'14.5"<br>E0°11'22.1" | 184 | UK5 | SL12 | <i>Rana temporaria</i> | 37 | KP122484 |
| UK | 08/07/2013 | Sevenoaks pond, Kent, UK | N51°16'14.5"<br>E0°11'22.1" | 184 | UK5 | SL13 | <i>Rana temporaria</i> | 34 | KP122485 |
| UK | 08/07/2013 | Sevenoaks pond, Kent, UK | N51°16'14.5"<br>E0°11'22.1" | 184 | UK5 | SL14 | <i>Rana temporaria</i> | 38 | KP122486 |

|    |                |                             |                             |     |     |      |                        |    |          |
|----|----------------|-----------------------------|-----------------------------|-----|-----|------|------------------------|----|----------|
| UK | 08/07/20<br>13 | Sevenoaks pond,<br>Kent, UK | N51°16'14.5"<br>E0°11'22.1" | 184 | UK5 | SL15 | <i>Rana temporaria</i> | 32 | KP122487 |
| UK | 08/07/20<br>13 | Sevenoaks pond,<br>Kent, UK | N51°16'14.5"<br>E0°11'22.1" | 184 | UK5 | SL16 | <i>Rana temporaria</i> | 38 | KP122488 |
| UK | 08/07/20<br>13 | Sevenoaks pond,<br>Kent, UK | N51°16'14.5"<br>E0°11'22.1" | 184 | UK5 | SL17 | <i>Rana temporaria</i> | 32 | KP122489 |
| UK | 08/07/20<br>13 | Sevenoaks pond,<br>Kent, UK | N51°16'14.5"<br>E0°11'22.1" | 184 | UK5 | SL18 | <i>Rana temporaria</i> | 30 | KP122490 |
| UK | 08/07/20<br>13 | Sevenoaks pond,<br>Kent, UK | N51°16'14.5"<br>E0°11'22.1" | 184 | UK5 | SL19 | <i>Rana temporaria</i> | 31 | KP122491 |
| UK | 08/07/20<br>13 | Sevenoaks pond,<br>Kent, UK | N51°16'14.5"<br>E0°11'22.1" | 184 | UK5 | SL20 | <i>Rana temporaria</i> | 39 | KP122492 |

---

**Supplementary Table S6: Label information for each NAG01 targeted clone library sequence recovered from the frog liver sampled.**

| <b>Country</b> | <b>Year</b> | <b>Frog sample number</b> | <b>Clones double strand sequenced</b> | <b>NCBI accession number</b> |
|----------------|-------------|---------------------------|---------------------------------------|------------------------------|
| Cameroon       | 2009        | A11                       | A11.2                                 | KP122697                     |
|                |             |                           | A11.3                                 | KP122709                     |
|                |             |                           | A11.4                                 | KP122632                     |
|                |             |                           | A11.5                                 | KP122706                     |
|                |             |                           | A11.6                                 | KP122704                     |
|                |             |                           | A12.1                                 | KP122715                     |
| Cameroon       | 2009        | A12                       | A12.3                                 | KP122633                     |
|                |             |                           | A12.4                                 | KP122634                     |
|                |             |                           | A12.6                                 | KP122584                     |
|                |             |                           | A13.1                                 | KP122618                     |
| Cameroon       | 2009        | A13                       | A13.2                                 | KP122648                     |
|                |             |                           | A13.3                                 | KP122626                     |
|                |             |                           | A13.5                                 | KP122730                     |
|                |             |                           | A13.6                                 | KP122638                     |
|                |             |                           | A14.7                                 | KP122667                     |
| Cameroon       | 2009        | A14                       | A14.4                                 | KP122635                     |
|                |             |                           | A14.9                                 | KP122619                     |
|                |             |                           | A14.10                                | KP122700                     |
|                |             |                           | A14.5                                 | KP122692                     |
|                |             |                           | A15.8                                 | KP122605                     |
| Cameroon       | 2006        | A15                       | A15.9                                 | KP122570                     |
|                |             |                           | A15.2                                 | KP122599                     |
|                |             |                           | A15.3                                 | KP122582                     |
|                |             |                           | A15.4                                 | KP122642                     |

|          |      |     |        |          |
|----------|------|-----|--------|----------|
| Cameroon | 2009 | A16 | A15.5  | KP122643 |
|          |      |     | A16.6  | KP122629 |
|          |      |     | A16.1  | KP122649 |
|          |      |     | A16.3  | KP122575 |
|          |      |     | A16.4  | KP122574 |
|          |      |     | A16.5  | KP122650 |
| Cameroon | 2009 | A17 | A17.7  | KP122724 |
|          |      |     | A17.4  | KP122726 |
|          |      |     | A17.1  | KP122639 |
|          |      |     | A17.2  | KP122573 |
|          |      |     | A17.3  | KP122651 |
| Cameroon | 2008 | A18 | A18.11 | KP122646 |
|          |      |     | A18.8  | KP122592 |
|          |      |     | A18.9  | KP122711 |
|          |      |     | A18.5  | KP122658 |
|          |      |     | A18.10 | KP122659 |
| Cameroon | 2009 | A19 | A19.11 | KP122729 |
|          |      |     | A19.2  | KP122572 |
|          |      |     | A19.5  | KP122660 |
|          |      |     | A19.4  | KP122661 |
|          |      |     | A19.10 | KP122590 |
| Cameroon | 2009 | A20 | A20.6  | KP122622 |
|          |      |     | A20.7  | KP122600 |
|          |      |     | A20.1  | KP122662 |
|          |      |     | A20.2  | KP122588 |
|          |      |     | A20.5  | KP122663 |
| Cameroon | 2012 | A38 | A38.1  | KP122586 |
|          |      |     | A38.2  | KP122628 |

|          |      |     |        |          |
|----------|------|-----|--------|----------|
|          |      |     | A38.6  | KP122744 |
|          |      |     | A38.8  | KP122743 |
| Cameroon | 2012 | A55 | A55.1  | KP122675 |
|          |      |     | A55.2  | KP122674 |
|          |      |     | A55.3  | KP122676 |
|          |      |     | A55.4  | KP122693 |
| Cameroon | 2012 | A54 | A54.2  | KP122733 |
|          |      |     | A54.7  | KP122677 |
|          |      |     | A54.8  | KP122735 |
|          |      |     | A54.14 | KP122678 |
| Tanzania | 1998 | A21 | A21.1  | KP122637 |
|          |      |     | A21.2  | KP122654 |
|          |      |     | A21.3  | KP122684 |
|          |      |     | A21.4  | KP122656 |
|          |      |     | A21.5  | KP122617 |
| Tanzania | 1998 | A22 | A22.1  | KP122601 |
|          |      |     | A22.2  | KP122680 |
|          |      |     | A22.3  | KP122623 |
|          |      |     | A22.4  | KP122580 |
|          |      |     | A22.5  | KP122721 |
| Tanzania | 1998 | A23 | A23.1  | KP122699 |
|          |      |     | A23.2  | KP122719 |
|          |      |     | A23.4  | KP122596 |
|          |      |     | A23.5  | KP122686 |
|          |      |     | A23.6  | KP122717 |
| Tanzania | 1998 | A24 | A24.4  | KP122640 |
|          |      |     | A24.3  | KP122595 |
|          |      |     | A24.5  | KP122723 |

|          |      |     |       |          |
|----------|------|-----|-------|----------|
|          |      |     | A24.6 | KP122641 |
|          |      |     | A24.7 | KP122594 |
| Tanzania | 1998 | A25 | A25.2 | KP122625 |
|          |      |     | A25.3 | KP122666 |
|          |      |     | A25.4 | KP122620 |
|          |      |     | A25.5 | KP122687 |
|          |      |     | A25.6 | KP122630 |
| Tanzania | 1998 | A26 | A26.1 | KP122657 |
|          |      |     | A26.2 | KP122606 |
|          |      |     | A26.3 | KP122645 |
|          |      |     | A26.5 | KP122689 |
|          |      |     | A26.4 | KP122688 |
| Tanzania | 1998 | A27 | A27.3 | KP122691 |
|          |      |     | A27.4 | KP122597 |
|          |      |     | A27.5 | KP122728 |
|          |      |     | A27.8 | KP122631 |
|          |      |     | A27.9 | KP122710 |
| Tanzania | 1998 | A28 | A28.2 | KP122621 |
|          |      |     | A28.4 | KP122603 |
|          |      |     | A28.5 | KP122602 |
|          |      |     | A28.7 | KP122636 |
|          |      |     | A28.9 | KP122644 |
| Tanzania | 1998 | A30 | A30.1 | KP122701 |
|          |      |     | A30.5 | KP122670 |
|          |      |     | A30.6 | KP122669 |
|          |      |     | A30.7 | KP122668 |
|          |      |     | A30.8 | KP122702 |
| Tanzania | 1998 | A31 | A31.3 | KP122653 |

|            |      |      |        |          |
|------------|------|------|--------|----------|
|            |      |      | A31.5  | KP122683 |
|            |      |      | A31.7  | KP122679 |
|            |      |      | A31.8  | KP122652 |
|            |      |      | A31.10 | KP122665 |
| Tanzania   | 1998 | A32  | A32.1  | KP122690 |
|            |      |      | A32.2  | KP122614 |
|            |      |      | A32.3  | KP122703 |
|            |      |      | A32.4  | KP122698 |
|            |      |      | A32.5  | KP122579 |
| Tanzania   | 1998 | A33  | A33.5  | KP122607 |
|            |      |      | A33.4  | KP122608 |
|            |      |      | A33.6  | KP122609 |
|            |      |      | A33.7  | KP122610 |
|            |      |      | A33.10 | KP122611 |
| Tanzania   | 1998 | A34  | A34.1  | KP122713 |
|            |      |      | A34.4  | KP122694 |
|            |      |      | A34.5  | KP122593 |
|            |      |      | A34.6  | KP122695 |
|            |      |      | A34.7  | KP122696 |
| Tanzania   | 1998 | A35  | A35.3  | KP122672 |
|            |      |      | A35.5  | KP122578 |
|            |      |      | A35.7  | KP122671 |
|            |      |      | A35.8  | KP122576 |
|            |      |      | A35.10 | KP122577 |
| Fr. Guiana | 2010 | T3.6 | T3.6.1 | KP122571 |
|            |      |      | T3.6.2 | KP122712 |
|            |      |      | T3.6.3 | KP122681 |
|            |      |      | T3.6.4 | KP122598 |



|            |      |       |          |          |
|------------|------|-------|----------|----------|
| Fr. Guiana | 2010 | T5.1  | T3.6.5   | KP122655 |
|            |      |       | T5.1.4   | KP122581 |
|            |      |       | T5.1.13  | KP122604 |
|            |      |       | T5.1.9   | KP122612 |
|            |      |       | T5.1.10  | KP122613 |
| Fr. Guiana | 2013 | G2.13 | G2.13_A4 | KP122725 |
|            |      |       | G2.13_C4 | KP122727 |
|            |      |       | G2.13_D4 | KP122747 |
|            |      |       | G2.13_E4 | KP122714 |
| Fr. Guiana | 2013 | G8.1  | G8.1_A3  | KP122647 |
|            |      |       | G8.1_B3  | KP122616 |
|            |      |       | G8.1_C3  | KP122746 |
|            |      |       | G8.1_E3  | KP122682 |
| São Tomé   | 2011 | CZ1.1 | CZ1.1_A1 | KP122731 |
|            |      |       | CZ1.1_B1 | KP122627 |
|            |      |       | CZ1.1_C1 | KP122734 |
|            |      |       | CZ1.1_D1 | KP122740 |
| São Tomé   | 2011 | CZ1.2 | CZ1.2_A2 | KP122738 |
|            |      |       | CZ1.2_B2 | KP122736 |
|            |      |       | CZ1.2_C2 | KP122673 |
|            |      |       | CZ1.2_D2 | KP122737 |
| São Tomé   | 2011 | CZ1.3 | CZ1.3_A3 | KP122732 |
|            |      |       | CZ1.3_B3 | KP122708 |
|            |      |       | CZ1.3_D3 | KP122707 |
|            |      |       | CZ1.3_F3 | KP122745 |
| São Tomé   | 2011 | CZ1.4 | CZ1.4_A4 | KP122741 |
|            |      |       | CZ1.4_B4 | KP122739 |
|            |      |       | CZ1.4_C4 | KP122742 |

|                      |      |       |          |          |
|----------------------|------|-------|----------|----------|
| London, UK           | 2013 | SL10  | CZ1.4_D4 | KP122747 |
|                      |      |       | SL10_A1  | KP122591 |
|                      |      |       | SL10_F1  | KP122589 |
|                      |      |       | SL10_G1  | KP122587 |
|                      |      |       | SL10_H1  | KP122685 |
| London, UK           | 2013 | SL18  | SL18.1   | KP122585 |
|                      |      |       | SL18.2   | KP122722 |
|                      |      |       | SL18.3   | KP122705 |
|                      |      |       | SL18.4   | KP122716 |
| NHM pond, London, UK | 2013 | NHM16 | NHM16.1  | KP122720 |
|                      |      |       | NHM16.4  | KP122718 |
|                      |      |       | NHM16.5  | KP122583 |
|                      |      |       | NHM16.7  | KP122624 |

---

**Supplementary Table S7: Details of published 18S rDNA sequences of known taxa used in phylogenetic analysis reported in Figure 1.**

| Accession no. | Class     | Order      | Genus                | Species              | Strain/Clone                                     | Reference |
|---------------|-----------|------------|----------------------|----------------------|--------------------------------------------------|-----------|
| EF675616      | Perkinsea | Perkinsida | *                    | *                    | <i>Lithobates<br/>sphenocephalus</i><br>pathogen | (1)       |
| AF126013      | Perkinsea | Perkinsida | <i>Perkinsus</i>     | <i>marinus</i>       | Isolate P1                                       | (20)      |
| AF497479      | Perkinsea | Perkinsida | <i>Perkinsus</i>     | <i>marinus</i>       | TXsc                                             | (21)      |
| AY486141      | Perkinsea | Perkinsida | <i>Perkinsus</i>     | <i>mediterraneus</i> | isolate 4                                        | (22)      |
| AF509333      | Perkinsea | Perkinsida | <i>Perkinsus</i>     | <i>atlanticus</i>    | ALG1                                             | (23)      |
| AF140295      | Perkinsea | Perkinsida | <i>Perkinsus</i>     | <i>atlanticus</i>    | Galicia                                          | (24)      |
| AY486139      | Perkinsea | Perkinsida | <i>Perkinsus</i>     | <i>mediterraneus</i> | isolate 1                                        | (22)      |
| AF252288      | Perkinsea | Perkinsida | <i>Perkinsus</i>     | *                    | CCA2001                                          | (25)      |
| AY305326      | Perkinsea | Perkinsida | <i>Perkinsus</i>     | <i>andrewsi</i>      | ATCC 50807                                       | (26)      |
| AF042707      | Perkinsea | Perkinsida | <i>Perkinsus</i>     | sp.                  | G117                                             | (20)      |
| AY487831      | Perkinsea | Perkinsida | <i>Perkinsus</i>     | <i>mediterraneus</i> | Isolate 5                                        | (22)      |
| AF102171      | Perkinsea | Perkinsida | <i>Perkinsus</i>     | <i>andrewsi</i>      |                                                  | (25)      |
| AF133909      | Perkinsea | Perkinsida | <i>Parvilucifera</i> | <i>infectans</i>     |                                                  | (27)      |
| FJ424512      | Perkinsea | Perkinsida | <i>Parvilucifera</i> | <i>prorocentri</i>   |                                                  | (28)      |
| KF359483      | Perkinsea | Perkinsida | <i>Parvilucifera</i> | <i>rostrata</i>      |                                                  | (29)      |

|          |             |                 |                      |                |                                            |                                   |
|----------|-------------|-----------------|----------------------|----------------|--------------------------------------------|-----------------------------------|
| EU502912 | Perkinsea   | Perkinsida      | <i>Parvilucifera</i> | <i>sinerae</i> |                                            | (30)                              |
| HM483394 | Syndiniales | Amoebophryaceae | <i>Amoebophrya</i>   | sp.            | ex <i>Gymnodinium</i><br><i>instriatum</i> | (31)                              |
| HM483395 | Syndiniales | Amoebophryaceae | <i>Amoebophrya</i>   | sp.            | ex <i>Akashiwo</i><br><i>sanguineaum</i>   | (31)                              |
| HQ658161 | Syndiniales | Amoebophryaceae | <i>Amoebophrya</i>   | sp.            | RCC1626                                    | (32)                              |
| AF472555 | Syndiniales | Amoebophryaceae | <i>Amoebophrya</i>   | sp.            | ex <i>Akashiwo</i><br><i>sanguineaum</i>   | (33)                              |
| AY208894 | Syndiniales | Amoebophryaceae | <i>Amoebophrya</i>   | sp.            | ex <i>Scrippsiella</i> sp.                 | John <i>et al.</i><br>unpublished |

---

**Supplementary Table S8: Table of first hit of the BLASTn results of the amphibian 16S sequence using Mega BLAST.**  
(NCBI- accessed October 2014).

| Tadpole Id | Query Id | % Identity | Length | E value | Accession number | NCBI definition                                           |
|------------|----------|------------|--------|---------|------------------|-----------------------------------------------------------|
| A15        | 16S_A15  | 100        | 516    | 0       | FJ769103         | <i>Phrynobatrachus</i> sp. BMZ-2009 voucher MCZ           |
| A21        | 16S_A21  | 97.83      | 554    | 0       | DQ347318         | <i>Afrana angolensis</i> isolate 0992                     |
| A23        | 16S_A23  | 97.65      | 554    | 0       | DQ347318         | <i>Afrana angolensis</i> isolate 0992                     |
| A24        | 16S_A24  | 97.65      | 554    | 0       | DQ347318         | <i>Afrana angolensis</i> isolate 0992                     |
| A25        | 16S_A25  | 92.52      | 535    | 0       | JX996027         | <i>Leptopelis barbouri</i> voucher CAS:168472             |
| A27        | 16S_A27  | 92.52      | 535    | 0       | JX996027         | <i>Leptopelis barbouri</i> voucher CAS:168472             |
| A29        | 16S_A29  | 92.52      | 535    | 0       | JX996027         | <i>Leptopelis barbouri</i> voucher CAS:168472             |
| A31        | 16S_A31  | 97.84      | 555    | 0       | DQ283161         | <i>Leptopelis</i> sp. AMNH A168408                        |
| A32        | 16S_A32  | 97.84      | 555    | 0       | DQ283161         | <i>Leptopelis</i> sp. AMNH A168408                        |
| A33        | 16S_A33  | 97.84      | 555    | 0       | DQ283161         | <i>Leptopelis</i> sp. AMNH A168408                        |
| A34        | 16S_A34  | 97.84      | 555    | 0       | DQ283161         | <i>Leptopelis</i> sp. AMNH A168408                        |
| A35        | 16S_A35  | 92.51      | 534    | 0       | JX996027         | <i>Leptopelis barbouri</i> voucher CAS:168472             |
| A11        | 16S_A11  | 95.67      | 554    | 0       | JX564875         | <i>Leptopelis vermiculatus</i>                            |
| A12        | 16S_A12  | 92.12      | 533    | 0       | FJ594083         | <i>Hyperolius lamottei</i>                                |
| A13        | 16S_A13  | 96.95      | 557    | 0       | DQ283349         | <i>Astylosternus schioetzi</i> voucher UTA 52398          |
| A14        | 16S_A14  | 99.63      | 537    | 0       | HM441260         | <i>Phrynobatrachus steindachneri</i> voucher MCZ A-138080 |
| A16        | 16S_A16  | 97.13      | 557    | 0       | DQ283349         | <i>Astylosternus schioetzi</i> voucher UTA-52398          |
| A17        | 16S_A17  | 100        | 503    | 0       | GU443976         | <i>Hyperolius riggenbachi</i> isolate MVZ234752           |
| A18        | 16S_A18  | 100        | 503    | 0       | GU443976         | <i>Hyperolius riggenbachi</i> isolate MVZ234752           |
| A19        | 16S_A19  | 100        | 503    | 0       | GU443976         | <i>Hyperolius riggenbachi</i> isolate MVZ234752           |
| A2         | 16S_A2   | 98.45      | 582    | 0       | AY789013         | <i>Xenopus tropicalis</i>                                 |
| A1         | 16S_A1   | 98.45      | 582    | 0       | AY789013         | <i>Xenopus tropicalis</i>                                 |
| A30        | 16S_A30  | 92.52      | 535    | 0       | JX996027         | <i>Leptopelis barbouri</i> voucher CAS:168472             |
| A26        | 16S_A26  | 92.52      | 535    | 0       | JX996027         | <i>Leptopelis barbouri</i> voucher CAS:168472             |
| A28        | 16S_A28  | 92.51      | 534    | 0       | JX996027         | <i>Leptopelis barbouri</i> voucher CAS:168472             |
| A22        | 16S_A22  | 97.83      | 554    | 0       | DQ347318         | <i>Afrana angolensis</i> isolate 0992                     |
| A20        | 16S_A20  | 98.67      | 527    | 0       | KF178891         | <i>Kassina maculosa</i> voucher MCZ:A-147846              |

|       |           |       |     |   |          |                                                         |
|-------|-----------|-------|-----|---|----------|---------------------------------------------------------|
| A3    | 16S_A3    | 98.45 | 582 | 0 | AY789013 | <i>Xenopus tropicalis</i>                               |
| A4    | 16S_A4    | 98.45 | 582 | 0 | AY789013 | <i>Xenopus tropicalis</i>                               |
| A5    | 16S_A5    | 98.11 | 581 | 0 | DQ283363 | <i>Xenopus (Silurana) tropicalis</i> voucher UTA A47158 |
| A6    | 16S_A6    | 98.11 | 581 | 0 | DQ283363 | <i>Xenopus (Silurana) tropicalis</i> voucher UTA A47158 |
| A7    | 16S_A7    | 98.11 | 581 | 0 | DQ283363 | <i>Xenopus (Silurana) tropicalis</i> voucher UTA A47158 |
| A8    | 16S_A8    | 96.98 | 530 | 0 | AF124108 | <i>Astylosternus schioetzi</i>                          |
| A9    | 16S_A9    | 96.98 | 530 | 0 | AF124108 | <i>Astylosternus schioetzi</i>                          |
| A10   | 16S_A10   | 96.98 | 530 | 0 | AF124108 | <i>Astylosternus schioetzi</i>                          |
| T1.1  | 16S_T1.1  | 99.64 | 560 | 0 | AY843628 | <i>Hypsiboas geographicus</i>                           |
| T3.1  | 16S_T3.1  | 99.64 | 560 | 0 | AY843628 | <i>Hypsiboas geographicus</i>                           |
| T3.3  | 16S_T3.3  | 99.64 | 560 | 0 | AY843628 | <i>Hypsiboas geographicus</i>                           |
| T3.4  | 16S_T3.4  | 99.64 | 560 | 0 | AY843628 | <i>Hypsiboas geographicus</i>                           |
| T3.5  | 16S_T3.5  | 99.64 | 560 | 0 | AY843628 | <i>Hypsiboas geographicus</i>                           |
| T3.6  | 16S_T3.6  | 99.64 | 560 | 0 | AY843628 | <i>Hypsiboas geographicus</i>                           |
| T3.7  | 16S_T3.7  | 99.64 | 560 | 0 | AY843628 | <i>Hypsiboas geographicus</i>                           |
| T3.8  | 16S_T3.8  | 99.64 | 560 | 0 | AY843628 | <i>Hypsiboas geographicus</i>                           |
| T3.9  | 16S_T3.9  | 99.64 | 560 | 0 | AY843628 | <i>Hypsiboas geographicus</i>                           |
| T4.1  | 16S_T4.1  | 100   | 560 | 0 | DQ502246 | <i>Allobates femoralis</i> isolate 1325                 |
| T5.1  | 16S_T5.1  | 99.83 | 572 | 0 | KF002053 | <i>Hyla helenae</i> voucher MHNLS 20151                 |
| T5.2  | 16S_T5.2  | 100   | 571 | 0 | KF002053 | <i>Hyla helenae</i> voucher MHNLS 20151                 |
| T5.4  | 16S_T5.4  | 99.83 | 572 | 0 | KF002053 | <i>Hyla helenae</i> voucher MHNLS 20151                 |
| T5.5  | 16S_T5.5  | 100   | 571 | 0 | KF002053 | <i>Hyla helenae</i> voucher MHNLS 20151                 |
| T6.2  | 16S_T6.2  | 99.47 | 568 | 0 | GQ366286 | <i>Phyllomedusa tomopterna</i> voucher CFBH 2451        |
| T6.3  | 16S_T6.3  | 99.47 | 568 | 0 | GQ366286 | <i>Phyllomedusa tomopterna</i> voucher CFBH 2451        |
| T6.4  | 16S_T6.4  | 99.47 | 568 | 0 | GQ366286 | <i>Phyllomedusa tomopterna</i> voucher CFBH 2451        |
| T3.10 | T3.10_16S | 99.46 | 560 | 0 | AY843628 | <i>Hypsiboas geographicus</i>                           |
| T3.11 | T3.11_16S | 99.46 | 560 | 0 | AY843628 | <i>Hypsiboas geographicus</i>                           |
| T3.12 | T3.12_16S | 99.64 | 560 | 0 | AY843628 | <i>Hypsiboas geographicus</i>                           |
| T3.13 | T3.13_16S | 99.64 | 560 | 0 | AY843628 | <i>Hypsiboas geographicus</i>                           |
| T5.8  | T5.8_16S  | 100   | 571 | 0 | KF002053 | <i>Hyla helenae</i> voucher MHNLS 20151                 |
| T5.9  | T5.9_16S  | 100   | 571 | 0 | KF002053 | <i>Hyla helenae</i> voucher MHNLS 20151                 |
| T6.5  | T6.5_16S  | 98.94 | 568 | 0 | GQ366286 | <i>Phyllomedusa tomopterna</i> voucher CFBH 2451        |

|       |           |       |     |   |          |                                                  |
|-------|-----------|-------|-----|---|----------|--------------------------------------------------|
| T3.14 | T3.14_16S | 99.64 | 560 | 0 | AY843628 | <i>Hypsiboas geographicus</i>                    |
| T5.6  | T5.6_16S  | 100   | 571 | 0 | KF002053 | <i>Hyla helenae</i> voucher MHNLS 20151          |
| G1.1  | G1.1_16S  | 96.07 | 585 | 0 | EF632056 | <i>Leptodactylus knudseni</i> voucher QCAZ 13244 |
| G1.2  | G1.2_16S  | 96.07 | 585 | 0 | EF632056 | <i>Leptodactylus knudseni</i> voucher QCAZ 13244 |
| G1.3  | G1.3_16S  | 96.07 | 585 | 0 | EF632056 | <i>Leptodactylus knudseni</i> voucher QCAZ 13244 |
| G1.4  | G1.4_16S  | 96.07 | 585 | 0 | EF632056 | <i>Leptodactylus knudseni</i> voucher QCAZ 13244 |
| G1.5  | G1.5_16S  | 98.13 | 587 | 0 | GQ366286 | <i>Phyllomedusa tomopterna</i> voucher CFBH 2451 |
| G2.9  | G2.9_16S  | 98.29 | 586 | 0 | GQ366286 | <i>Phyllomedusa tomopterna</i> voucher CFBH 2451 |
| G2.1  | G2.1_16S  | 98.29 | 586 | 0 | GQ366286 | <i>Phyllomedusa tomopterna</i> voucher CFBH 2451 |
| G2.2  | G2.2_16S  | 98.29 | 586 | 0 | GQ366286 | <i>Phyllomedusa tomopterna</i> voucher CFBH 2451 |
| G2.3  | G2.3_16S  | 98.29 | 586 | 0 | GQ366286 | <i>Phyllomedusa tomopterna</i> voucher CFBH 2451 |
| G2.4  | G2.4_16S  | 98.29 | 586 | 0 | GQ366286 | <i>Phyllomedusa tomopterna</i> voucher CFBH 2451 |
| G2.5  | G2.5_16S  | 98.29 | 586 | 0 | GQ366286 | <i>Phyllomedusa tomopterna</i> voucher CFBH 2451 |
| G2.6  | G2.6_16S  | 98.29 | 586 | 0 | GQ366286 | <i>Phyllomedusa tomopterna</i> voucher CFBH 2451 |
| G2.7  | G2.7_16S  | 98.29 | 586 | 0 | GQ366286 | <i>Phyllomedusa tomopterna</i> voucher CFBH 2451 |
| G2.8  | G2.8_16S  | 98.29 | 586 | 0 | GQ366286 | <i>Phyllomedusa tomopterna</i> voucher CFBH 2451 |
| G2.10 | G2.10_16S | 98.29 | 586 | 0 | GQ366286 | <i>Phyllomedusa tomopterna</i> voucher CFBH 2451 |
| G2.11 | G2.11_16S | 98.29 | 586 | 0 | GQ366286 | <i>Phyllomedusa tomopterna</i> voucher CFBH 2451 |
| G2.12 | G2.12_16S | 98.29 | 586 | 0 | GQ366286 | <i>Phyllomedusa tomopterna</i> voucher CFBH 2451 |
| G2.13 | G2.13_16S | 98.29 | 586 | 0 | GQ366286 | <i>Phyllomedusa tomopterna</i> voucher CFBH 2451 |
| G3.1  | G3.1_16S  | 95.82 | 550 | 0 | JF790119 | <i>Hypsiboas geographicus</i> A isolate AS0175   |
| G3.2  | G3.2_16S  | 95.82 | 550 | 0 | JF790119 | <i>Hypsiboas geographicus</i> A isolate AS0175   |
| G3.3  | G3.3_16S  | 95.82 | 550 | 0 | JF790119 | <i>Hypsiboas geographicus</i> A isolate AS0175   |
| G4.1  | G4.1_16S  | 98.29 | 586 | 0 | GQ366286 | <i>Phyllomedusa tomopterna</i> voucher CFBH 2451 |
| G6.2  | G6.2_16S  | 98.29 | 586 | 0 | GQ366286 | <i>Phyllomedusa tomopterna</i> voucher CFBH 2451 |
| G6.3  | G6.3_16S  | 98.29 | 586 | 0 | GQ366286 | <i>Phyllomedusa tomopterna</i> voucher CFBH 2451 |
| G6.4  | G6.4_16S  | 98.29 | 586 | 0 | GQ366286 | <i>Phyllomedusa tomopterna</i> voucher CFBH 2451 |
| G6.5  | G6.5_16S  | 98.29 | 586 | 0 | GQ366286 | <i>Phyllomedusa tomopterna</i> voucher CFBH 2451 |
| G6.6  | G6.6_16S  | 98.29 | 586 | 0 | GQ366286 | <i>Phyllomedusa tomopterna</i> voucher CFBH 2451 |
| G6.7  | G6.7_16S  | 98.29 | 586 | 0 | GQ366286 | <i>Phyllomedusa tomopterna</i> voucher CFBH 2451 |
| G4.2  | G4.2_16S  | 99.64 | 559 | 0 | JN970655 | <i>Hypsiboas crepitans</i> isolate ROM_44089     |
| G4.3  | G4.3_16S  | 99.66 | 584 | 0 | AY843724 | <i>Phyllomedusa hypochondrialis</i>              |

|       |           |       |     |   |          |                                                |
|-------|-----------|-------|-----|---|----------|------------------------------------------------|
| G5.1  | G5.1_16S  | 93.41 | 592 | 0 | AY549345 | <i>Hyla minuta</i> voucher MACN 33799          |
| G5.2  | G5.2_16S  | 93.41 | 592 | 0 | AY549345 | <i>Hyla minuta</i> voucher MACN 33799          |
| G5.3  | G5.3_16S  | 93.41 | 592 | 0 | AY549345 | <i>Hyla minuta</i> voucher MACN 33799          |
| G5.4  | G5.4_16S  | 93.41 | 592 | 0 | AY549345 | <i>Hyla minuta</i> voucher MACN 33799          |
| G5.5  | G5.5_16S  | 93.41 | 592 | 0 | AY549345 | <i>Hyla minuta</i> voucher MACN 33799          |
| G5.6  | G5.6_16S  | 93.41 | 592 | 0 | AY549345 | <i>Hyla minuta</i> voucher MACN 33799          |
| G5.7  | G5.7_16S  | 93.41 | 592 | 0 | AY549345 | <i>Hyla minuta</i> voucher MACN 33799          |
| G5.8  | G5.8_16S  | 93.41 | 592 | 0 | AY549345 | <i>Hyla minuta</i> voucher MACN 33799          |
| G5.9  | G5.9_16S  | 93.41 | 592 | 0 | AY549345 | <i>Hyla minuta</i> voucher MACN 33799          |
| G5.10 | G5.10_16S | 93.41 | 592 | 0 | AY549345 | <i>Hyla minuta</i> voucher MACN 33799          |
| G4.4  | G4.4_16S  | 93.41 | 592 | 0 | AY549345 | <i>Hyla minuta</i> voucher MACN 33799          |
| G4.5  | G4.5_16S  | 93.41 | 592 | 0 | AY549345 | <i>Hyla minuta</i> voucher MACN 33799          |
| G6.1  | G6.1_16S  | 90.13 | 598 | 0 | AY843757 | <i>Scinax elaeochroa</i>                       |
| G8.1  | G8.1_16S  | 95.82 | 550 | 0 | JF790119 | <i>Hypsiboas geographicus</i> A isolate AS0175 |
| G8.3  | G8.3_16S  | 95.82 | 550 | 0 | JF790119 | <i>Hypsiboas geographicus</i> A isolate AS0175 |
| G8.4  | G8.4_16S  | 95.82 | 550 | 0 | JF790119 | <i>Hypsiboas geographicus</i> A isolate AS0175 |
| G8.5  | G8.5_16S  | 95.82 | 550 | 0 | JF790119 | <i>Hypsiboas geographicus</i> A isolate AS0175 |
| G8.6  | G8.6_16S  | 95.82 | 550 | 0 | JF790119 | <i>Hypsiboas geographicus</i> A isolate AS0175 |
| G8.7  | G8.7_16S  | 95.82 | 550 | 0 | JF790119 | <i>Hypsiboas geographicus</i> A isolate AS0175 |
| G8.8  | G8.8_16S  | 95.82 | 550 | 0 | JF790119 | <i>Hypsiboas geographicus</i> A isolate AS0175 |
| G8.9  | G8.9_16S  | 95.82 | 550 | 0 | JF790119 | <i>Hypsiboas geographicus</i> A isolate AS0175 |
| G8.2  | G8.2_16S  | 95.82 | 550 | 0 | JF790119 | <i>Hypsiboas geographicus</i> A isolate AS0175 |
| G8.10 | G8.10_16S | 95.82 | 550 | 0 | JF790119 | <i>Hypsiboas geographicus</i> A isolate AS0175 |
| G8.11 | G8.11_16S | 95.82 | 550 | 0 | JF790119 | <i>Hypsiboas geographicus</i> A isolate AS0175 |
| NHM1  | NHM1_16S  | 99.5  | 596 | 0 | AY840246 | <i>Bufo bufo</i> isolate karasu                |
| NHM2  | NHM2_16S  | 99.5  | 596 | 0 | AY840246 | <i>Bufo bufo</i> isolate karasu                |
| NHM3  | NHM3_16S  | 99.5  | 596 | 0 | AY840246 | <i>Bufo bufo</i> isolate karasu                |
| NHM4  | NHM4_16S  | 99.5  | 596 | 0 | AY840246 | <i>Bufo bufo</i> isolate karasu                |
| NHM9  | NHM9_16S  | 99.5  | 596 | 0 | AY840246 | <i>Bufo bufo</i> isolate karasu                |
| NHM16 | NHM16_16S | 99.5  | 596 | 0 | AY840246 | <i>Bufo bufo</i> isolate karasu                |
| NHM17 | NHM17_16S | 99.5  | 596 | 0 | AY840246 | <i>Bufo bufo</i> isolate karasu                |
| NHM18 | NHM18_16S | 99.5  | 596 | 0 | AY840246 | <i>Bufo bufo</i> isolate karasu                |



|       |           |       |     |   |          |                                             |
|-------|-----------|-------|-----|---|----------|---------------------------------------------|
| NHM19 | NHM19_16S | 99.5  | 596 | 0 | AY840246 | <i>Bufo bufo</i> isolate karasu             |
| NHM20 | NHM20_16S | 99.5  | 596 | 0 | AY840246 | <i>Bufo bufo</i> isolate karasu             |
| NHM21 | NHM21_16S | 99.5  | 596 | 0 | AY840246 | <i>Bufo bufo</i> isolate karasu             |
| NHM22 | NHM22_16S | 99.5  | 596 | 0 | AY840246 | <i>Bufo bufo</i> isolate karasu             |
| NHM23 | NHM23_16S | 99.5  | 596 | 0 | AY840246 | <i>Bufo bufo</i> isolate karasu             |
| NHM24 | NHM24_16S | 99.5  | 596 | 0 | AY840246 | <i>Bufo bufo</i> isolate karasu             |
| NHM25 | NHM25_16S | 99.5  | 596 | 0 | AY840246 | <i>Bufo bufo</i> isolate karasu             |
| NHM26 | NHM26_16S | 99.5  | 596 | 0 | AY840246 | <i>Bufo bufo</i> isolate karasu             |
| NHM5  | NHM5_16S  | 99.65 | 572 | 0 | DQ283129 | <i>Rana temporaria</i> voucher ZSM 762/2000 |
| NHM6  | NHM6_16S  | 99.65 | 572 | 0 | DQ283129 | <i>Rana temporaria</i> voucher ZSM 762/2000 |
| NHM7  | NHM7_16S  | 99.65 | 572 | 0 | DQ283129 | <i>Rana temporaria</i> voucher ZSM 762/2000 |
| NHM8  | NHM8_16S  | 99.65 | 572 | 0 | DQ283129 | <i>Rana temporaria</i> voucher ZSM 762/2000 |
| SL10  | SL10_16S  | 99.65 | 572 | 0 | DQ283129 | <i>Rana temporaria</i> voucher ZSM 762/2000 |
| SL1   | SL1_16S   | 99.65 | 572 | 0 | DQ283129 | <i>Rana temporaria</i> voucher ZSM 762/2000 |
| SL2   | SL2_16S   | 99.65 | 572 | 0 | DQ283129 | <i>Rana temporaria</i> voucher ZSM 762/2000 |
| SL3   | SL3_16S   | 99.65 | 572 | 0 | DQ283129 | <i>Rana temporaria</i> voucher ZSM 762/2000 |
| SL4   | SL4_16S   | 99.65 | 572 | 0 | DQ283129 | <i>Rana temporaria</i> voucher ZSM 762/2000 |
| SL5   | SL5_16S   | 99.65 | 572 | 0 | DQ283129 | <i>Rana temporaria</i> voucher ZSM 762/2000 |
| SL6   | SL6_16S   | 99.65 | 572 | 0 | DQ283129 | <i>Rana temporaria</i> voucher ZSM 762/2000 |
| SL7   | SL7_16S   | 99.65 | 572 | 0 | DQ283129 | <i>Rana temporaria</i> voucher ZSM 762/2000 |
| SL8   | SL8_16S   | 99.65 | 572 | 0 | DQ283129 | <i>Rana temporaria</i> voucher ZSM 762/2000 |
| SL9   | SL9_16S   | 99.65 | 572 | 0 | DQ283129 | <i>Rana temporaria</i> voucher ZSM 762/2000 |
| SL11  | SL11_16S  | 99.65 | 572 | 0 | DQ283129 | <i>Rana temporaria</i> voucher ZSM 762/2000 |
| SL12  | SL12_16S  | 99.65 | 572 | 0 | DQ283129 | <i>Rana temporaria</i> voucher ZSM 762/2000 |
| SL13  | SL13_16S  | 99.65 | 572 | 0 | DQ283129 | <i>Rana temporaria</i> voucher ZSM 762/2000 |
| SL14  | SL14_16S  | 99.65 | 572 | 0 | DQ283129 | <i>Rana temporaria</i> voucher ZSM 762/2000 |
| SL15  | SL15_16S  | 99.65 | 572 | 0 | DQ283129 | <i>Rana temporaria</i> voucher ZSM 762/2000 |
| SL16  | SL16_16S  | 99.65 | 572 | 0 | DQ283129 | <i>Rana temporaria</i> voucher ZSM 762/2000 |
| SL17  | SL17_16S  | 99.65 | 572 | 0 | DQ283129 | <i>Rana temporaria</i> voucher ZSM 762/2000 |
| SL18  | SL18_16S  | 99.65 | 572 | 0 | DQ283129 | <i>Rana temporaria</i> voucher ZSM 762/2000 |
| SL19  | SL19_16S  | 99.65 | 572 | 0 | DQ283129 | <i>Rana temporaria</i> voucher ZSM 762/2000 |
| SL20  | SL20_16S  | 99.65 | 572 | 0 | DQ283129 | <i>Rana temporaria</i> voucher ZSM 762/2000 |

|      |          |       |     |   |          |                                                   |
|------|----------|-------|-----|---|----------|---------------------------------------------------|
| CZE1 | 16S_CZE1 | 99.46 | 554 | 0 | AB685766 | <i>Rana temporaria</i> voucher: KUHE:28259        |
| CZE2 | 16S_CZE2 | 100   | 554 | 0 | AB685766 | <i>Rana temporaria</i> voucher: KUHE:28259        |
| CZE3 | 16S_CZE3 | 100   | 554 | 0 | AB685766 | <i>Rana temporaria</i> voucher: KUHE:28259        |
| CZE4 | 16S_CZE4 | 99.65 | 576 | 0 | AY843601 | <i>Hyla arborea</i>                               |
| CZ11 | 16S_CZ11 | 99.11 | 560 | 0 | DQ283223 | <i>Phrynobatrachus dispar</i> voucher CAS 218995  |
| CZ12 | 16S_CZ12 | 98.94 | 567 | 0 | DQ283223 | <i>Phrynobatrachus dispar</i> voucher CAS 218995  |
| CZ13 | 16S_CZ13 | 98.94 | 567 | 0 | DQ283223 | <i>Phrynobatrachus dispar</i> voucher CAS 218995  |
| CZ14 | 16S_CZ14 | 99.12 | 566 | 0 | DQ283223 | <i>Phrynobatrachus dispar</i> voucher CAS 218995  |
| CZ3  | 16S_CZ3  | 99.66 | 583 | 0 | JN627423 | <i>Rana ridibundus</i> isolate RAFA-02            |
| CZ2  | 16S_CZ2  | 99.66 | 583 | 0 | JN627423 | <i>Rana ridibundus</i> isolate RAFA-02            |
| A47  | 16S_A47  | 99.43 | 528 | 0 | DQ022351 | <i>Amnirana albolabris</i>                        |
| A49  | 16S_A49  | 99.43 | 528 | 0 | DQ022351 | <i>Amnirana albolabris</i>                        |
| A50  | 16S_A50  | 99.43 | 528 | 0 | DQ022351 | <i>Amnirana albolabris</i>                        |
| A46  | 16S_A46  | 99.47 | 571 | 0 | AY843773 | <i>Trichobatrachus robustus</i>                   |
| A38  | 16S_A38  | 99.47 | 571 | 0 | AY843773 | <i>Trichobatrachus robustus</i>                   |
| A48  | 16S_A48  | 99.47 | 571 | 0 | AY843773 | <i>Trichobatrachus robustus</i>                   |
| A55  | 16S_A55  | 98.02 | 606 | 0 | GU183858 | <i>Bufo cf. regularis</i> FB-2010 voucher MW 6140 |
| A40  | 16S_A40  | 98.02 | 606 | 0 | GU183858 | <i>Bufo cf. regularis</i> FB-2010 voucher MW 6140 |
| A52  | 16S_A52  | 98.02 | 606 | 0 | GU183858 | <i>Bufo cf. regularis</i> FB-2010 voucher MW 6140 |
| A54  | 16S_A54  | 98.02 | 606 | 0 | GU183858 | <i>Bufo cf. regularis</i> FB-2010 voucher MW 6140 |
| A56  | 16S_A56  | 98.02 | 606 | 0 | GU183858 | <i>Bufo cf. regularis</i> FB-2010 voucher MW 6140 |
| A61  | 16S_A61  | 99.43 | 528 | 0 | DQ022351 | <i>Amnirana albolabris</i>                        |
| A60  | 16S_A60  | 99.43 | 528 | 0 | DQ022351 | <i>Amnirana albolabris</i>                        |
| A59  | 16S_A59  | 99.43 | 528 | 0 | DQ022351 | <i>Amnirana albolabris</i>                        |
| A58  | 16S_A58  | 99.43 | 528 | 0 | DQ022351 | <i>Amnirana albolabris</i>                        |
| A57  | 16S_A57  | 99.43 | 528 | 0 | DQ022351 | <i>Amnirana albolabris</i>                        |
| A53  | 16S_A53  | 99.43 | 528 | 0 | DQ022351 | <i>Amnirana albolabris</i>                        |

**Supplementary Table S9: Details of published 16S rDNA sequences of known amphibian taxa used in the phylogenetic analysis shown in Figure 3.**

| Accession no. | Order | Sub-order    | Super family | Family            | Genus                               | Species              | Strains      | Reference                 |
|---------------|-------|--------------|--------------|-------------------|-------------------------------------|----------------------|--------------|---------------------------|
| AY843773      | Anura | Neobatrachia | Ranoidea     | Arthroleptidae    | <i>Trichobatrachus</i>              | <i>robustus</i>      | DPL 3932     | (34)                      |
| HM441260      | Anura | Neobatrachia | Ranoidea     | Phrynobatrachidae | <i>Phrynobatrachus</i>              | <i>steindachneri</i> | MCZ A-138080 | Blackburn, DC unpublished |
| DQ347318      | Anura | Neobatrachia | Ranoidea     | Pyxicephalidae    | <i>Afrana</i><br>( <i>Amietia</i> ) | <i>angolensis</i>    | isolate 0992 | (35)                      |
| DQ283402      | Anura | Neobatrachia | Ranoidea     | Pyxicephalidae    | <i>Afrana</i><br>( <i>Amietia</i> ) | <i>vertebralis</i>   | AMNH A144977 | (36)                      |
| DQ283349      | Anura | Neobatrachia | Ranoidea     | Arthroleptidae    | <i>Astylosternus</i>                | <i>schioetzi</i>     | UTA 52398    | (36)                      |
| AY523765      | Anura | Neobatrachia | Ranoidea     | Microhylidae      | <i>Scaphiophryne</i>                | <i>marmorata</i>     | VUB 0540     | (37)                      |

|          |       |              |          |                |                        |                         |                  |                                             |
|----------|-------|--------------|----------|----------------|------------------------|-------------------------|------------------|---------------------------------------------|
| DQ283161 | Anura | Neobatrachia | Ranoidea | Arthroleptidae | <i>Leptopelis</i>      | sp.                     | AMNH<br>A168408  | (36)                                        |
| FJ807721 | Anura | Neobatrachia | Ranoidea | Arthroleptidae | <i>Leptopelis</i>      | <i>karissimbensis</i>   | ZFMK:87996       | Hoelting, M<br><i>et al.</i><br>unpublished |
| DQ283437 | Anura | Neobatrachia | Ranoidea | Hyperoliidae   | <i>Kassina</i>         | <i>senegalensis</i>     | RdS 803          | (36)                                        |
| DQ283356 | Anura | Neobatrachia | Ranoidea | Hyperoliidae   | <i>Phlyctimantis</i>   | <i>leonardi</i>         | DPL 4058         | (36)                                        |
| DQ283174 | Anura | Neobatrachia | Ranoidea | Hyperoliidae   | <i>Opisthothylax</i>   | <i>immaculatus</i>      | DPL 3968         | (36)                                        |
| EF646678 | Anura | Neobatrachia | Ranoidea | Hyperoliidae   | <i>Heterixalus</i>     | <i>madagascariensis</i> | ZSM<br>569/2000  | (38)                                        |
| AB612026 | Anura | Neobatrachia | Ranoidea | Arthroleptidae | <i>Trichobatrachus</i> | <i>robustus</i>         | taxon:11109<br>6 | (39)                                        |
| AY341723 | Anura | Neobatrachia | Ranoidea | Arthroleptidae | <i>Astylosternus</i>   | <i>diadematus</i>       | taxon:25228<br>6 | (40)                                        |

|          |       |              |          |              |                      |                                          |                   |      |
|----------|-------|--------------|----------|--------------|----------------------|------------------------------------------|-------------------|------|
| FJ594083 | Anura | Neobatrachia | Ranoidea | Hyperoliidae | <i>Hyperolius</i>    | <i>lamottei</i>                          | taxon:64348<br>9  | (41) |
| AF215431 | Anura | Neobatrachia | Ranoidea | Hyperoliidae | <i>Afrivalus</i>     | sp.                                      | MV-1999           | (42) |
| DQ283234 | Anura | Neobatrachia | Ranoidea | Hyperoliidae | <i>Afrivalus</i>     | <i>Stuhlmanni</i><br>( <i>pygmaeus</i> ) | CAS<br>214837     | (36) |
| FJ151068 | Anura | Neobatrachia | Ranoidea | Hyperoliidae | <i>Afrivalus</i>     | <i>paradorsalis</i>                      | AMCC:1<br>17589   | (43) |
| GQ366232 | Anura | Neobatrachia | Hyloidea | Hylidae      | <i>Phasmahyla</i>    | <i>guttata</i>                           | MNRJ<br>41688     | (44) |
| GQ366237 | Anura | Neobatrachia | Hyloidea | Hylidae      | <i>Phyllomedusa</i>  | <i>rohdei</i>                            | CFBHt<br>93       | (44) |
| AY843708 | Anura | Neobatrachia | Hyloidea | Hylidae      | <i>Osteocephalus</i> | <i>oophagus</i>                          | MNHN<br>2001.0828 | (34) |
| FJ965303 | Anura | Neobatrachia | Hyloidea | Hylidae      | <i>Osteocephalus</i> | <i>castaneicola</i>                      | NMP6V<br>73820    | (45) |

|          |       |              |          |              |                                                |                                         |                  |      |
|----------|-------|--------------|----------|--------------|------------------------------------------------|-----------------------------------------|------------------|------|
| AY326042 | Anura | Neobatrachia | Hyloidea | Hylidae      | <i>Trachycephalus</i>                          | <i>jordani</i>                          | DCC<br>2917      | (46) |
| AY326048 | Anura | Neobatrachia | Hyloidea | Hylidae      | <i>Trachycephalus</i>                          | <i>venulosus</i>                        | DCC 3069         | (46) |
| AY948746 | Anura | Neobatrachia | Hyloidea | Hylidae      | <i>Trachycephalus</i><br>( <i>Phrynohyas</i> ) | <i>venulosus</i><br>( <i>venulosa</i> ) | VUB 0987         | (47) |
| AY364371 | Anura | Neobatrachia | Hyloidea | Hylidae      | <i>Trachycephalus</i><br>( <i>Phrynohyas</i> ) | <i>venulosus</i><br>( <i>venulosa</i> ) | taxon:21380<br>3 | (48) |
| AY549323 | Anura | Neobatrachia | Hyloidea | Hylidae      | <i>Hypsiboas</i><br>( <i>Hyla</i> )            | <i>balzani</i>                          | DLR 41193        | (49) |
| DQ283442 | Anura | *            | Pipidae  | Xenopodinae  | <i>Xenopus</i>                                 | <i>gilli</i>                            | AMNH<br>A153027  | (36) |
| AB612030 | Anura | Neobatrachia | Ranoidea | Mantellinae  | <i>Blommersia</i>                              | <i>wittei</i>                           | ZSM:D48/20<br>00 | (39) |
| AB530639 | Anura | Neobatrachia | Ranoidea | Microhylidae | <i>Kaloula</i>                                 | <i>pulchra</i>                          | taxon:16793<br>4 | (50) |

|          |       |                |              |                |                          |                                   |                    |                                            |
|----------|-------|----------------|--------------|----------------|--------------------------|-----------------------------------|--------------------|--------------------------------------------|
| DQ283251 | Anura | *              | Pipidae      | Pipinae        | <i>Pipa</i>              | <i>carvalhoi</i>                  | Alexander Haas     | (36)                                       |
| DQ283156 | Anura | Pelobatoidea   | Pelobatidae  | *              | <i>Scaphiopus</i>        | <i>holbrookii</i>                 | AMNH A168434       | (36)                                       |
| EF397243 | Anura | Pelobatoidea   | Megophryidae | *              | <i>Xenophrys</i>         | <i>nankiangensis</i>              | CIB-XM835          | (51)                                       |
| DQ283432 | Anura | Bombinatoridae | *            | *              | <i>Bombina</i>           | <i>orientalis</i>                 | Rafael de Sa       | (36)                                       |
| EF566971 | Anura | Neobatrachia   | Hyloidea     | Hylidae        | <i>Acris</i>             | <i>gryllus</i>                    | ECM0052            | Lemmon, E M unpublished                    |
| DQ283257 | Anura | Neobatrachia   | Ranoidea     | Ranidae        | <i>Lithobates (Rana)</i> | <i>catesbeianus (catesbeiana)</i> | Bruce L. Christman | (36)                                       |
| AY779228 | Anura | Neobatrachia   | Ranoidea     | Ranidae        | <i>Lithobates (Rana)</i> | <i>palustris</i>                  | KU 204425          | (52)                                       |
| JX996027 | Anura | Neobatrachia   | Ranoidea     | Arthroleptidae | <i>Leptopelis</i>        | <i>barbouri</i>                   | CAS:168472         | Portillo, F. and Greenbaum, E. unpublished |

|          |       |              |          |                   |                             |                         |            |      |
|----------|-------|--------------|----------|-------------------|-----------------------------|-------------------------|------------|------|
| DQ283361 | Anura | Neobatrachia | Ranoidea | Arthroleptidae    | <i>Nyctibates</i>           | <i>corrugatus</i>       | UTA A44461 | (36) |
| DQ283223 | Anura | Neobatrachia | Ranoidea | Phrynobatrachidae | <i>Phrynobatrachus</i>      | <i>dispar</i>           | CAS 218995 | (36) |
| AB640932 | Anura | Neobatrachia | Ranoidea | Ranidae           | <i>Pelophylax (Rana)</i>    | <i>ridibundus</i>       | KTUFS-1    | (53) |
| AY549345 | Anura | Neobatrachia | Hyloidea | Hylidae           | <i>Dendropsophus (Hyla)</i> | <i>minutus (minuta)</i> | MACN 33799 | (49) |
| JF790084 | Anura | Neobatrachia | Hyloidea | Hylidae           | <i>Dendropsophus</i>        | <i>minutus</i>          | AS0474     | (54) |
| DQ022351 | Anura | Neobatrachia | Ranoidea | Ranidae           | <i>Hylarana (Amnirana)</i>  | <i>albolabris</i>       | TMSA84177  | (55) |
| DQ283369 | Anura | Neobatrachia | Ranoidea | Ranidae           | <i>Hylarana (Amnirana)</i>  | <i>albilabris</i>       | UTA A44424 | (36) |
| AY014377 | Anura | Neobatrachia | Ranoidea | Ranidae           | <i>Hylarana</i>             | <i>lepus</i>            | *          | (56) |



|          |       |              |          |                 |                                         |                      |                   |                             |
|----------|-------|--------------|----------|-----------------|-----------------------------------------|----------------------|-------------------|-----------------------------|
| DQ283433 | Anura | Neobatrachia | Hyloidea | Leptodactylidae | <i>Leptodactylus</i>                    | <i>discodactylus</i> | Rafael de Sa      | (36)                        |
| DQ283404 | Anura | Neobatrachia | Hyloidea | Leptodactylidae | <i>Leptodactylus</i>                    | <i>fuscus</i>        | AMNH<br>A139088   | (36)                        |
| DQ283163 | Anura | Neobatrachia | Hyloidea | Bufo            | <i>Amietophrynus</i><br>( <i>Bufo</i> ) | <i>regularis</i>     | FMNH<br>251386    | (36)                        |
| AY843740 | Anura | Neobatrachia | Hyloidea | Hylidae         | <i>Pseudis</i>                          | <i>paradoxa</i>      | MACN 38642        | (34)                        |
| DQ830810 | Anura | Neobatrachia | Hyloidea | Hylidae         | <i>Hyla</i>                             | <i>cinerea</i>       | LSUMZ 48181       | Smith, S. A.<br>unpublished |
| AY843563 | Anura | Neobatrachia | Hyloidea | Hylidae         | <i>Agalychnis</i>                       | <i>callidryas</i>    | RdS 537           | (34)                        |
| AY843692 | Anura | Neobatrachia | Hyloidea | Hylidae         | <i>Litoria</i>                          | <i>caerulea</i>      | AMNH A-<br>168409 | (34)                        |
| GQ204694 | Anura | Neobatrachia | Ranoidea | Rhacophoridae   | <i>Polypedates</i>                      | <i>maculatus</i>     | WHTKANT           | (57)                        |

|          |         |              |                |                |                          |                                       |              |      |
|----------|---------|--------------|----------------|----------------|--------------------------|---------------------------------------|--------------|------|
| AY779252 | Anura   | Neobatrachia | Ranoidea       | Ranidae        | <i>Lithobates (Rana)</i> | <i>sphenocephalus (sphenocephala)</i> | USC 7448     | (52) |
| AF215441 | Anura   | Neobatrachia | Ranoidea       | Hyperoliidae   | <i>Hyperolius</i>        | <i>viridiflavus</i>                   | *            | (42) |
| AY581644 | Anura   | *            | Pipidae        | Xenopodinae    | <i>Xenopus</i>           | <i>laevis</i>                         | MHNG 2644.53 | (58) |
| DQ283045 | Anura   | Neobatrachia | Hyloidea       | Dendrobatidae  | <i>Allobates</i>         | <i>femorialis</i>                     | LSUMZ 17552  | (36) |
| GQ366286 | Anura   | Neobatrachia | Hyloidea       | Hylidae        | <i>Phyllomedusa</i>      | <i>tomopterna</i>                     | CFBH 2451    | (44) |
| DQ092266 | Caudata | *            | Salamandroidea | Salamandridae  | <i>Pleurodeles</i>       | <i>nebulosus</i>                      | Anc12        | (59) |
| DQ283445 | Caudata | *            | Salamandroidea | Salamandridae  | <i>Pleurodeles</i>       | <i>waltl</i>                          | AMNH A168418 | (36) |
| DQ283407 | Caudata | *            | Salamandroidea | Ambystomatidae | <i>Ambystoma</i>         | <i>tigrinum</i>                       | AMNH A164658 | (36) |

EF107170    Caudat    \*                    Salamandr    Ambystomatida    *Ambystoma*    *mexicanum*    0907AmbMex    (47)  
                  a

---

**Supplementary Table S10: Detail of environmental sequences sampled from GenBank and reduced to triangles on Figure 1.**

| <b>Clade number</b> | <b>Accession no.</b> | <b>Environmental clone</b> | <b>Environment</b> | <b>Location</b>        | <b>Environment type</b> | <b>Reference</b> |
|---------------------|----------------------|----------------------------|--------------------|------------------------|-------------------------|------------------|
| 1                   | EU162624             | PAA9SP2005                 | Lake Pavin         | Massif Central, France | Oligo-mesotrophic lake  | (8)              |
| 1                   | EF527175             | SA2_2G9                    | Framvaren Fjord    | South-western Norway   | Axonic/sulfidic waters  | (9)              |
| 1                   | EU162630             | PAC8SP2005                 | Lake Pavin         | Massif Central, France | Oligo-mesotrophic lake  | (8)              |
| 1                   | JN090897             | KRL01E37                   | Lake Karla         | Greece                 | Lake                    | (17)             |
| 1                   | AY642744             | A31                        | Lake Aydat         | Massif Central, France | Eutrophic lake          | (60)             |
| 1                   | JN090873             | KRL01E13                   | Lake Karla         | Greece                 | Lake                    | (17)             |

|   |          |              |                |                                             |                        |                                  |
|---|----------|--------------|----------------|---------------------------------------------|------------------------|----------------------------------|
| 1 | DQ455739 | BB01-172.24w | Estuary        | USA: Barnegat Bay, NJ                       | Marine waters          | Lim <i>et al.</i><br>unpublished |
| 1 | EU162628 | PAD1SP2005   | Lake Pavin     | Massif Central, France                      | Oligo-mesotrophic lake | (8)                              |
| 1 | HQ191345 | PA2009C9     | Lake Pavin     | Massif Central, France                      | Oligo-mesotrophic lake | (10)                             |
| 1 | DQ103802 | M2_18C03     | Mariager Fjord | Danish east coast                           | Anoxic marine waters   | (13)                             |
| 2 | EU162625 | PAG5SP2005   | Lake Pavin     | Massif Central, France                      | Oligo-mesotrophic lake | (8)                              |
| 2 | EU162627 | PAD12SP2005  | Lake Pavin     | Massif Central, France                      | Oligo-mesotrophic lake | (8)                              |
| 3 | AY919720 | LG10-12      | Lake George    | Adirondack Park North-Eastern New York, USA | Oligotrophic lake      | (61)                             |
| 3 | AY919821 | LG53-06      | Lake George    | Adirondack Park North-Eastern New York, USA | Oligotrophic lake      | (61)                             |

|   |          |             |             |                                                   |                           |      |
|---|----------|-------------|-------------|---------------------------------------------------|---------------------------|------|
| 3 | AY919809 | LG36-11     | Lake George | Adirondack Park<br>North-Eastern<br>New York, USA | Oligotrophic lake         | (61) |
| 4 | DQ244020 | PAB11AU2004 | Lake Pavin  | Massif Central,<br>France                         | Oligo-mesotrophic<br>lake | (62) |
| 4 | DQ244021 | PAD10AU2004 | Lake Pavin  | Massif Central,<br>France                         | Oligo-mesotrophic<br>lake | (62) |
| 4 | DQ244035 | PAD7AU2004  | Lake Pavin  | Massif Central,<br>France                         | Oligo-mesotrophic<br>lake | (62) |
| 4 | DQ244037 | PAF7AU2004  | Lake Pavin  | Massif Central,<br>France                         | Oligo-mesotrophic<br>lake | (62) |
| 4 | DQ244034 | PAG2AU2004  | Lake Pavin  | Massif Central,<br>France                         | Oligo-mesotrophic<br>lake | (62) |
| 4 | AY642737 | A20         | Lake Aydat  | Massif Central,<br>France                         | Eutrophic lake            | (60) |
| 4 | AY919736 | LG15-10     | Lake George | Adirondack Park<br>North-Eastern<br>New York, USA | Oligotrophic lake         | (61) |

|   |          |             |                 |                                                   |                           |                             |
|---|----------|-------------|-----------------|---------------------------------------------------|---------------------------|-----------------------------|
| 5 | AY919682 | LG02-01     | Lake George     | Adirondack Park<br>North-Eastern<br>New York, USA | Oligotrophic lake         | (61)                        |
| 5 | AY919712 | LG09-02     | Lake George     | Adirondack Park<br>North-Eastern<br>New York, USA | Oligotrophic lake         | (61)                        |
| 5 | AY919769 | LG25-01     | Lake George     | Adirondack Park<br>North-Eastern<br>New York, USA | Oligotrophic lake         | (61)                        |
| 5 | DQ244031 | PAF8AU2004  | Lake Pavin      | Massif Central,<br>France                         | Oligo-mesotrophic<br>lake | (62)                        |
| 5 | DQ244027 | PAA22AU2004 | Lake Pavin      | Massif Central,<br>France                         | Oligo-mesotrophic<br>lake | (62)                        |
| 5 | GU290070 | TKR07E.24   | Lake Tanganyika | East Africa                                       | Oligotrophic lake         | Tarbe et al.<br>unpublished |
| 5 | AY919820 | LG50-10     | Lake George     | Adirondack Park<br>North-Eastern<br>New York, USA | Oligotrophic lake         | (61)                        |
| 6 | EF526795 | NA2_4B10    | Framvaren Fjord | Norway                                            | Anoxic marine<br>waters   | (9)                         |

|   |          |          |                 |        |                      |     |
|---|----------|----------|-----------------|--------|----------------------|-----|
| 6 | EF526831 | NA1_3C6  | Framvaren Fjord | Norway | Anoxic marine waters | (9) |
| 6 | EF526760 | NA2_2D10 | Framvaren Fjord | Norway | Anoxic marine waters | (9) |

---



## References

1. Davis AK, Yabsley MJ, Keel MK, & Maerz JC (2007) Discovery of a novel alveolate pathogen affecting southern leopard frogs in Georgia: description of the disease and host effects. *Ecohealth* 4:310-317.
2. Rothermel BB, *et al.* (2008) Widespread occurrence of the amphibian chytrid fungus *Batrachochytrium dendrobatidis* in the southeastern USA. *Dis. Aquat. Organ.* 82:3-18.
3. Jones MEB, Armien AG, Rothermel BB, & Pessier AP (2012) Granulomatous myositis associated with a novel alveolate pathogen in an adult southern leopard frog (*Lithobates sphenoccephalus*). *Dis. Aquat. Organ.* 102:163-167.
4. Landsberg JH, *et al.* (2013) Co-infection by alveolate parasites and frog virus 3-like ranavirus during an amphibian larval mortality event in Florida, USA. *Dis. Aquat. Organ.* 105:89-99.
5. Palumbi SR, *et al.* (1991) The simple fool's guide to PCR. *A collection of PCR protocols, version 2*, University of Hawaii, Honolulu).
6. Lepère C, Domaizon I, & Débroas D (2008) Unexpected importance of potential parasites in the composition of the freshwater small-eukaryote community. *Appl. Env. Microbiol.* 74(10):2940-2949.
7. Lefèvre E, *et al.* (2007) Unveiling fungal zooflagellate as members of freshwater picoeukaryotes: evidence from a molecular diversity study in a deep meromictic lake. *Environ. Microbiol.* 9(1):61-71.
8. Lefèvre E, Roussel B, Amblard C, & Sime-Ngando T (2008) The molecular diversity of freshwater picoeukaryotes reveals high occurrence of putative parasitoids in the plankton. *PLoS ONE* 3(6):e2324.
9. Behnke A, Barger KJ, Bunge J, & Stoeck T (2010) Spatio-temporal variations in protistan communities along an O/HS gradient in the anoxic Framvaren Fjord (Norway). *FEMS Microbiol. Ecol.* 72(1):89-102.
10. Monchy S, *et al.* (2011) Exploring and quantifying fungal diversity in freshwater lake ecosystems using rDNA cloning/sequencing and SSU tag pyrosequencing. *Environ. Microbiol.* 13(6):1433-1453.
11. Moon-van der Staay SY, De Wachter R, & Vaulot D (2001) Oceanic 18S rDNA sequences from picoplankton reveal unsuspected eukaryotic diversity. *Nature* 409:607-610.
12. Lefranc M, Thénot A, Lepère C, & Débroas D (2005) Genetic diversity of small eukaryotes in lakes differing by their trophic status. *Appl. Env. Microbiol.* 71(10):5935 - 5942.
13. Zuendorf A, Bunge J, Behnke A, Barger KJ, & Stoeck T (2006) Diversity estimates of microeukaryotes below the chemocline of the anoxic Mariager Fjord, Denmark. *FEMS Microbiol. Ecol.* 58:476-491.
14. Lopez-Garcia P, Philippe H, Gail F, & Moreira D (2003) Autochthonous eukaryotic diversity in hydrothermal sediment and experimental microcolonizers at the Mid-Atlantic Ridge. *Proc. Natl. Acad. Sci. USA* 100:697-702.
15. Lara E, Mitchell EA, Moreira D, & Lopez Garcia P (2011) Highly diverse and seasonally dynamic protist community in a pristine peat bog. *Protist* 162(1):14-32.
16. Richards TA, Veprikskiy AA, Gouliamova DE, & Nierzwicki-Bauer SA (2005) The molecular diversity of freshwater picoeukaryotes from an oligotrophic lake reveals diverse, distinctive and globally dispersed lineages. *Environ. Microbiol.* 7(9):1413-1425.
17. Oikonomou A, Katsiapi M, Karayanni H, Moustaka-Gouni M, & Kormas KA (2012) Plankton microorganisms coinciding with two consecutive mass fish kills in a newly reconstructed lake. *ScientificWorldJournal* 50135.

18. Gosner K (1960) A simplified table for staging anuran embryos and larvae with notes on identification. *Herpetologica* 16(3):183-219.
19. Nieuwkoop P & Faber J (1994) *Normal table of Xenopus laevis 1967* (Garlan Publishing Inc., NY).
20. Kotob SI, McLaughlin SM, Van Berkum P, & Faisal M (1999) Discrimination between two *Perkinsus* spp. isolated from the softshell clam, *Mya arenaria*, by sequence analysis of two internal transcribed spacers regions and the 5.8S ribosomal RNA gene. *Parasitology* 119:363-368.
21. Robledo JA, Wright AC, Marsh AG, & Vasta GR (1999) Nucleotide sequence variability in the nontranscribed spacer of the rRNA locus in the oyster parasite *Perkinsus marinus*. *J. Parasitol.* 85(4):650-656.
22. Casas SM, *et al.* (2004) *Perkinsus mediterraneus* n. sp., a protistan parasite of the European flat oyster *Ostrea edulis* from the Balearic Islands, Mediterranean Sea. *Dis. Aquat. Organ.* 58:231-244.
23. Robledo JA, Nunes PA, Cancela ML, & Vasta GR (2002) Development of an in vitro clonal culture and characterization of the rRNA gene cluster of *Perkinsus atlanticus*, a protistan parasite of the clam *Tapes decussatus*. *J. Euk. Microbiol.* 49(5):414-422.
24. Robledo JA, Coss CA, & Vasta GR (2000) Characterization of the ribosomal RNA locus of *Perkinsus atlanticus* and development of a polymerase chain reaction-based diagnostic assay. *J. Parasitol.* 86(5):972-978.
25. Coss CA, Robledo JAF, Ruiz GM, & Vasta GR (2001) Description of *Perkinsus andrewsi* n.sp. isolated from the baltic clam (*Macoma balthica*) by characterization of the ribosomal RNA locus and development of a species-specific PCR-based diagnostic assay. *J. Euk. Microbiol.* 48(52-61).
26. Pecher WT, Robledo JA, & Vasta GR (2004) Identification of a second rRNA gene unit in the *Perkinsus andrewsi* genome. *J. Euk. Microbiol.* 51(2):234-245.
27. Noren F, Moestrup O, & Rehnstam-Holm AS (1999) *Parvilucifera infectans* Noren et Moestrup gen. et sp. nov. (Perkinsozoa phylum nov.): a parasitic flagellate capable of killing toxic microalgae. *European Journal of Protistology* 35:233-254.
28. Hoppenrath M & Leander BS (2009) Molecular phylogeny of *Parvilucifera prorocentri* (Alveolata, Myzozoa): Insights into Perkinsid character evolution. *J. Euk. Microbiol.* 56(3):251-256s.
29. Lepelletier F, *et al.* (2014) *Parvilucifera rostrata* sp. nov. (Perkinsozoa), a novel parasitoid that infects planktonic dinoflagellates. *Protist* 165(1):31-49.
30. Figueroa RI, Garcés E, & Camp J (2010) Reproductive plasticity and local adaptation in the host-parasite system formed by the toxic *Alexandrium minutum* and the dinoflagellate parasite *Parvilucifera sinerae*. *Harmful algae* 10(1):56-63.
31. Coats DW, Kim S, Bachvaroff TR, Handy SM, & Delwiche CF (2004) *Tintinnophagus acutus* n. g., n. sp. (Phylum Dinoflagellata), an ectoparasite of the ciliate *Tintinnopsis cylindrica* Daday 1887, and its relationship to *Duboscquodinium collini* Grasse 1952. *J. Euk. Microbiol.* 57(6):468-482.
32. Chambouvet A, *et al.* (2011) Interplay between the parasite *Amoebophrya* sp. (Alveolata) and the cyst formation of the red tide dinoflagellate *Scrippsiella trochoidea*. *Protist* 162(4):637-649.
33. Gunderson JH, John SA, Boman WC, & Coats DW (2002) Multiple strains of the parasitic dinoflagellate *Amoebophrya* exist in Chesapeake Bay. *J. Euk. Microbiol.* 49(6):469-474.

34. Faivovich J, *et al.* (2005) Systematic Review of the frog family Hylidae, with special reference to the Hylinae: Phylogenetic analysis and taxonomic revision. *Bull. Am. Mus. Nat. Hist.* 294:1-240.
35. Bossuyt F, Brown R, Hillis D, Cannatella D, & Milinkovitch M (2006) Phylogeny and biogeography of a cosmopolitan frog radiation: Late cretaceous diversification resulted in continent-scale endemism in the family ranidae. *Syst. Biol.* 55(4):579-594.
36. Frost DR, *et al.* (2006) The amphibian tree of life. *Bull. Am. Mus. Nat. Hist.* 297.
37. Roelants K & Bossuyt F (2005) Archaeobatrachian paraphyly and pangaeian diversification of crown-group frogs. *Syst. Biol.* 54(1):111-126.
38. Wollenberg K, Glaw F, Meyer A, & Vences M (2007) Molecular phylogeny of Malagasy reed frogs, *Heterixalus*, and the relative performance of bioacoustics and color-patterns for resolving their systematics. *Mol. Phylogenet. Evol.* 45(1):14-22.
39. Kurabayashi A, *et al.* (2011) From Antarctica or Asia? New colonization scenario for Australian-New Guinean narrow mouth toads suggested from the findings on a mysterious genus *Gastrophrynoides*. *BMC Evol. Biol.* 11(1):175.
40. Vences M, *et al.* (2003) Multiple overseas dispersal in amphibians. *Proc. R. Soc. Lond., B, Biol. Sci.* 270(1532):2435-2442.
41. Veith M, *et al.* (2009) Multiple evolution of sexual dichromatism in African reed frogs. *Mol. Phylogenet. Evol.* 51(2):388-393.
42. Vences M (2000) Phylogenetic studies of ranoid frogs (Amphibia:Anura), with a discussion of the origin and evolution of the vertebrate clades of Madagascar. PhD (Universitaet Bonn, Germany).
43. Blackburn D (2008) Biogeography and evolution of body size and life history of African frogs: phylogeny of squeakers (*Arthroleptis*) and long-fingered frogs (*Cardioglossa*) estimated from mitochondrial data. *Mol. Phylogenet. Evol.* 43(3):806-826.
44. Faivovich J, *et al.* (2010) The phylogenetic relationships of the charismatic poster frogs, Phyllomedusinae (Anura, Hylidae) *Cladistics* 26(3):227-261.
45. Moravec J, *et al.* (2009) A new species of *Osteocephalus* (Anura: Hylidae) from Amazonian Bolivia: first evidence of tree frog breeding in fruit capsules of the Brazil nut tree. *Zootaxa* 2215:37-54.
46. Darst C & Cannatella D (2004) Novel relationships among hyloid frogs inferred from 12S and 16S mitochondrial DNA sequences. *Mol. Phylogenet. Evol.* 31(2):462-475.
47. Roelants K, *et al.* (2007) Global patterns of diversification in the history of modern amphibians. *Proc. Natl. Acad. Sci. U.S.A.* 104(3):887-892.
48. Biju S & Bossuyt F (2003) New frog family from India reveals an ancient biogeographical link with the Seychelles. *Nature* 425(6959):711-714.
49. Faivovich J, *et al.* (2004) A molecular perspective on the phylogeny of the *Hyla pulchella* species group (Anura, Hylidae). *Mol. Phylogenet. Evol.* 32(3):938-950.
50. Hasan M, *et al.* (2014) Genetic divergences of South and Southeast Asian frogs: a case study of several taxa based on 16S ribosomal RNA gene data with notes on the generic name *Fejervarya*. *Turk J Zool* 38:389-411.
51. Fu J, Weadick C, & Bi K (2007) A phylogeny of the high-elevation Tibetan megophryid frogs and evidence for the multiple origins of reversed sexual size dimorphism. *J. Zool.* 273(3):315-325.
52. Hillis D & Wilcox T (2005) Phylogeny of the New World true frogs (*Rana*). *Mol. Phylogenet. Evol.* 34(2):299-314.

53. Bulbul U, Matsui M, Kutrup B, & Eto K (2011) Taxonomic relationships among turkish water frogs as revealed by phylogenetic analyses using mtDNA gene sequences. *Zool. Sci.* 28(12):930-936.
54. Jansen M, Bloch R, Schulze A, & Pfenninger M (2011) Integrative inventory of Bolivia s lowland anurans reveals hidden diversity. *Zool. Scr.* 40(6):567-583.
55. Scott E (2005) A phylogeny of ranid frogs (Anura: Ranoidea: Ranidae), based on a simultaneous analysis of morphological and molecular data. *Cladistics* 21:507-574
56. Kosuch J, Vences M, Dubois A, Ohler A, & Bohme W (2001) Out of Asia: mitochondrial DNA evidence for an Oriental origin of tiger frogs, genus *Hoplobatrachus*. *Mol. Phylogenet. Evol.* 21(3):398-407.
57. Meegaskumbura M, *et al.* (2010) *Taruga* (Anura:Rhacophoridae), a new genus of foam-nesting tree frogs endemic to Sri Lanka. *Ceylon J Sci Biol Sci* 39(2):75-94.
58. Evans B, Kelley D, Tinsley R, Melnick D, & Cannatella D (2004) A mitochondrial DNA phylogeny of African clawed frogs: phylogeography and implications for polyploid evolution. *Mol. Phylogenet. Evol.* 33(1):197-213.
59. Carranza S & Amat F (2005) Taxonomy, biogeography and evolution of *Euproctus* (Amphibia: Salamandridae), with the resurrection of the genus *Calotriton* and the description of a new endemic species from the Iberian Peninsula. *Zool. J. Linn. Soc.* 145(4):555-582.
60. Lefranc M, Thenot A, Lepere C, & Debroas D (2005) Genetic diversity of small eukaryotes in lakes differing by their trophic status. *Appl. Env. Microbiol.* 71(10):5935-5942.
61. Richards TA, Vepritskiy AA, Gouliamova DE, & Nierzwicki-Bauer SA (2005) The molecular diversity of freshwater picoeukaryotes from an oligotrophic lake reveals diverse, distinctive and globally dispersed lineages. *Environ. Microbiol.* 7(9):1413-1425.
62. Lefevre E, *et al.* (2007) Unveiling fungal zooflagellate as members of freshwater picoeukaryotes: evidence from a molecular diversity study in a deep meromictic lake. *Environ. Microbiol.* 9(1):61-71.
